# Supplementary material for: Dual-catalytic decarbonylation of fatty acid methyl esters to form olefins
Source: Royal Society of Chemistry journal article supplement (doi:10.1039/c8cc03823f), 2018-01-01
Supplement: c8cc03823f1.pdf [file c8cc03823f1.pdf]

# Electronic Supplementary Information

## for

### Dual-Catalytic Decarbonylation of Fatty Acid Methyl Esters to Form Olefins

*Megan E. Fieser,<sup>a†</sup> Sydonie D. Schimler,<sup>a†</sup> Lauren A. Mitchell,<sup>a</sup> Emily G. Wilborn,<sup>a</sup> Alex John,<sup>a</sup>  
Levi T. Hogan,<sup>a</sup> Brooke Benson,<sup>a</sup> Anne M. LaPointe,<sup>b\*</sup> William B. Tolman<sup>a,c\*</sup>*

<sup>a</sup>Department of Chemistry, Center for Sustainable Polymers, University of Minnesota, 207

Pleasant Street SE, Minneapolis, Minnesota 55455, United States

<sup>b</sup>Department of Chemistry and Chemical Biology, Baker Laboratory, Cornell University, Ithaca,

New York 14853, United States

<sup>c</sup>Currently: Department of Chemistry, Washington University in St. Louis, One Brookings Drive,

Campus Box 1134, St. Louis, Missouri 63130, United States

## Table of Contents

|                                                                                                                                                 |            |
|-------------------------------------------------------------------------------------------------------------------------------------------------|------------|
| <b>1. General Considerations</b>                                                                                                                | <b>S5</b>  |
| <b>2. Materials</b>                                                                                                                             | <b>S5</b>  |
| 2.1. Structures, names, and vendors for materials used in this study                                                                            | S5         |
| <b>3. Synthesis</b>                                                                                                                             | <b>S7</b>  |
| 3.1. Synthesis of Methyl Palmitate (2)                                                                                                          | S7         |
| Figure S1. <sup>1</sup> H NMR spectrum of methyl palmitate (2).                                                                                 | S8         |
| Figure S2. <sup>13</sup> C NMR spectrum of methyl palmitate (2).                                                                                | S8         |
| 3.2. Synthesis of Donor Group Esters                                                                                                            | S9         |
| Figure S3. <sup>1</sup> H NMR spectrum of pyridin-2-ylmethyl palmitate (1).                                                                     | S10        |
| Figure S4. <sup>13</sup> C NMR spectrum of pyridin-2-ylmethyl palmitate (1).                                                                    | S10        |
| Figure S5. <sup>1</sup> H NMR spectrum of benzyl palmitate (4).                                                                                 | S11        |
| Figure S6. <sup>13</sup> C NMR spectrum of benzyl palmitate (4).                                                                                | S12        |
| <b>4. High Throughput Design and Results</b>                                                                                                    | <b>S12</b> |
| 4.1 High throughput screening (general procedures)                                                                                              | S12        |
| 4.2. Results of high throughput screening experiments                                                                                           | S13        |
| Table S1. Screening of 24 different metal complexes and 4 ligands for the decarbonylation of 1.                                                 | S13        |
| Table S2. Screening of 8 directing group alcohols and 12 Lewis acids for the transesterification of 2 to 1.                                     | S14        |
| Table S3. Screening of 24 different ligands and 4 metal complexes for the decarbonylation of 1.                                                 | S15        |
| Table S4. Screening the effect of Lewis acids on the decarbonylation of 1.                                                                      | S16        |
| Table S5. Screening promising metal/ligand combinations, directing group alcohols, and Lewis acids for the dual-catalytic decarbonylation of 2. | S17        |
| <b>5. Representative Bulk Catalysis Reactions</b>                                                                                               | <b>S18</b> |
| <b>6. Data for Catalysis Reactions</b>                                                                                                          | <b>S19</b> |
| 6.1. Decarbonylation Reactions                                                                                                                  | S19        |
| Scheme S1. Proposed decarbonylation reactions of esters.                                                                                        | S19        |
| Figure S7. Representative <sup>1</sup> H NMR spectrum of products from decarbonylation.                                                         | S19        |
| Table S6. Decarbonylation reactions of pyridin-2-ylmethyl palmitate (1) with metal complexes (without ligands).                                 | S20        |

|                                                                                                                                                                                         |            |
|-----------------------------------------------------------------------------------------------------------------------------------------------------------------------------------------|------------|
| <b>Table S7.</b> Decarbonylation reactions of pyridin-2-ylmethyl palmitate ( <b>1</b> ) with metal complexes and ligands found to be promising in high throughput studies.              | <b>S21</b> |
| <b>Table S8.</b> Control decarbonylation reactions of <b>1</b> or <b>4</b> under various conditions with Ru <sub>3</sub> (CO) <sub>12</sub> /PCy <sub>3</sub> catalyst system.          | <b>S22</b> |
| <b>Table S9.</b> Control decarbonylation reactions of <b>1</b> in the presence of MeOH.                                                                                                 | <b>S22</b> |
| <b>6.2. Transesterification Reactions</b>                                                                                                                                               | <b>S22</b> |
| <b>Scheme S2.</b> Proposed transesterification of methyl palmitate ( <b>2</b> ) with different alcohols to form new esters with donor groups.                                           | <b>S22</b> |
| <b>Figure S8.</b> Representative <sup>1</sup> H NMR spectrum of products from transesterification.                                                                                      | <b>S23</b> |
| <b>Table S10.</b> Transesterification of methyl palmitate ( <b>2</b> ) and 2-pyridinemethanol ( <b>3</b> ) with various Lewis acids. <sup>a</sup>                                       | <b>S23</b> |
| <b>Table S11.</b> Control reactions for the transesterification of methyl palmitate ( <b>2</b> ) with various alcohols.                                                                 | <b>S24</b> |
| <b>Table S12.</b> Transesterification reactions of methyl palmitate ( <b>2</b> ) with various alcohols and zinc Lewis acids.                                                            | <b>S24</b> |
| <b>Table S13.</b> Transesterification reactions of methyl palmitate ( <b>2</b> ) with various alcohols and indium and lanthanum Lewis acids.                                            | <b>S25</b> |
| <b>6.3. Dual-Catalysis Reactions</b>                                                                                                                                                    | <b>S25</b> |
| <b>Scheme S3.</b> Proposed dual-catalytic decarbonylation of methyl palmitate ( <b>2</b> ) to form olefins.                                                                             | <b>S25</b> |
| <b>Figure S9.</b> Representative <sup>1</sup> H NMR spectrum of products from dual-catalysis.                                                                                           | <b>S26</b> |
| <b>Figure S10.</b> Representative GC/MS spectral data of products from dual-catalysis.                                                                                                  | <b>S27</b> |
| <b>Table S14.</b> Time study of the dual-catalytic decarbonylation of methyl palmitate ( <b>2</b> ) with 2-pyridinemethanol ( <b>3</b> ).                                               | <b>S27</b> |
| <b>Table S15.</b> Control reactions of the dual-catalytic decarbonylation of methyl palmitate ( <b>2</b> ).                                                                             | <b>S28</b> |
| <b>Table S16.</b> Dual-catalytic decarbonylation of methyl palmitate ( <b>2</b> ) in a 35 mL pressure vessel.                                                                           | <b>S29</b> |
| <b>Table S17.</b> Dual-catalytic decarbonylation of methyl palmitate ( <b>2</b> ) in a 25 mL round bottom flask with a reflux condenser and a drying agent above the reaction solution. | <b>S29</b> |
| <b>Table S18.</b> Dual-catalytic decarbonylation of methyl palmitate ( <b>2</b> ) with various alcohols and Lewis acids.                                                                | <b>S30</b> |
| <b>Table S19.</b> Dual-catalytic decarbonylation reactions with palmitic acid.                                                                                                          | <b>S30</b> |

**Table S20.** Studying the effect of adding catalytic reagents after 14 h in a 35 mL pressure vessel. **S31**

**7. References** **S31**

## 1. General Considerations

All manipulations of air and water sensitive compounds were carried out under nitrogen in an MBraun Labmaster glovebox or by using standard Schlenk line techniques.  $^1\text{H}$  and  $^{13}\text{C}$  NMR spectra were recorded on a Bruker AX400, AV500 or AM400. Chemical shifts ( $\delta$ ) for  $^1\text{H}$  NMR spectra were referenced to the residual protons on deuterated chloroform (7.26 ppm) and  $^{13}\text{C}$  NMR spectra were referenced to the residual chloroform (77.16 ppm). Mass spectrometry data were recorded on a Bruker BioTOF II ESI/TOF-MS. GC/MS spectral data were collected on a Hewlett Packard HP 6890 Series GC system accompanied by a Hewlett Packard 5973 Mass Selective Detector. The standard method used for all runs involved an initial oven temperature of 50 °C (held for 2 min) followed by a 20 °C min<sup>-1</sup> ramp to 70 °C (held for 6 min), followed by a final 20 °C min<sup>-1</sup> ramp to 230 °C (held for 3 min).

## 2. Materials

Dry and degassed 1,3-dimethyl-3,4,5,6-tetrahydro-2(1H)-pyrimidinone (DMPU) was used as received (Sigma-Aldrich). Liquid alcohols were dried over activated molecular sieves and degassed with three freeze-pump-thaws before bringing them into the glovebox for use. Solid alcohols, ligands, and metals were used as received.  $\text{CDCl}_3$  was used as received from Cambridge Isotope Laboratories. Palmitic acid (TCI America), oxalyl chloride (Sigma Aldrich), thionyl chloride (Sigma Aldrich), triethylamine (Sigma Aldrich), magnesium sulfate (Sigma Aldrich), and dimethylformamide (Sigma Aldrich) were used as received. Carbon monoxide was used as received. Solvents (methanol, ethyl acetate, and hexanes) were purchased from Sigma Aldrich and used as received. Solvents for air sensitive reactions (tetrahydrofuran and dichloromethane) were purchased from Sigma Aldrich, sparged with ultrahigh purity (UHP) grade argon and passed through columns containing Q-5 and molecular sieves into a Schlenk flask for use.

### 2.1. Structures, names, and vendors for materials used in this study.

#### Metals:

$\text{Ru}_3(\text{CO})_{12}$  (Sigma Aldrich)  
 $[\text{Ru}(p\text{-cymene})\text{Cl}_2]_2$  (Sigma Aldrich)  
 $\text{Ru}(\text{COD})(\text{methylallyl})_2$  (Acros)  
 $\text{Ru}(\text{C}_5\text{Me}_5)(\text{COD})_2\text{Cl}$  (Sigma Aldrich)  
 $[\text{Ru}(\text{CO})_3\text{Cl}_2]_2$  (Sigma Aldrich)  
 $\text{FeCl}_2$  (Sigma Aldrich)  
 $\text{Fe}(\text{CO})_3(\text{PPh}_3)_2$  (synthesized according to ref<sup>1</sup>)  
 $[(\text{C}_5\text{H}_5)\text{Fe}(\text{CO})_3]_2$  (Strem Chemicals)  
 $\text{CoCl}_2$  (Strem)  
 $\text{Co}_2(\text{CO})_8$  (Strem Chemicals)  
 $\text{NaCo}(\text{CO})_4$  (synthesized according to ref<sup>3</sup>)  
 $\text{Cr}(\text{C}_6\text{H}_6)_2$  (Sigma Aldrich)  
 $\text{CrCl}_3$  (Sigma Aldrich)  
 $\text{PdCl}_2$  (Strem Chemicals)  
 $\text{Pd}(\text{PPh}_3)_4$  (Sigma Aldrich)  
 $\text{Pd}_2(\text{dba})_3$  (dba = dibenzylideneacetone)  
 $\text{NiCl}_2$  (Sigma Aldrich)  
 $\text{Ni}(\text{OAc})_2$  (Sigma Aldrich)  
 $\text{Ni}(\text{COD})_2$  (Alfa Aesar)

$\text{Ni}(\text{PPh}_3)_4$  (synthesized according to ref<sup>2</sup>)

$[\text{Rh}(\text{COD})\text{Cl}]_2$  (Strem Chemicals)

$[\text{Rh}(\text{COD})_2]\text{OTf}$  (Sigma Aldrich)

$\text{VCl}_3(\text{THF})_3$  (Aldrich)

$\text{Mn}(\text{acac})_2$  (Sigma Aldrich)

$\text{Os}_3(\text{CO})_{12}$  (VWR)

$[\text{Ir}(\text{COD})\text{Cl}]_2$  (Sigma Aldrich)

$\text{Na}[(\text{C}_5\text{H}_5)\text{Mo}(\text{CO})_3]$  (Sigma Aldrich)

#### Lewis Acids

$\text{ZnCl}_2$  (Fisher Scientific or Sigma Aldrich)

$\text{CuCl}_2$  (Strem Chemicals)

Mol sieves (4 angstrom) (Acros)

$\text{InCl}_3$  (Sigma Aldrich)

$\text{MgO}$  (Sigma Aldrich)

$\text{CeO}_2$  (Sigma Aldrich)

$\text{ZnO}$  (Sigma Aldrich)

$\text{LaCl}_3$  (Alfa Aesar)

*p*-TsOH (Sigma Aldrich)

$\text{LiCl}$  (Fisher Scientific)

$\text{KI}$  (Sigma Aldrich)

NaOAc (Sigma Aldrich)

Al(O<sup>*i*</sup>Pr)<sub>3</sub> (Strem Chemicals)

## Ligands

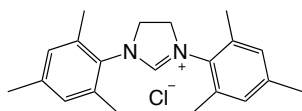

1,3-Bis(2,4,6-trimethylphenyl)  
imidazolium chloride  
Protonated SIMes  
Sigma Aldrich

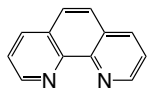

Phenanthroline  
L1  
(Sigma Aldrich)

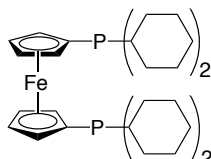

1,1'-Bis(dicyclohexylphosphino)  
ferrocene  
L2  
Alfa Aesar

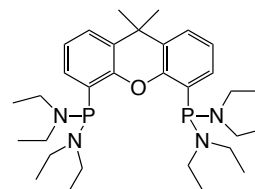

P,P'-(9,9-Dimethyl-9H-xanthene-  
4,5-diyl)bis[N,N,N',N'-tetraethyl-  
phosphonous diamide]  
L3  
Sigma Aldrich

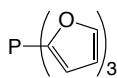

Tri(2-furyl)phosphine  
P(furyl)<sub>3</sub>  
Oakwood Products

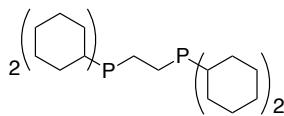

1,2-Bis(dicyclohexylphosphino)ethane  
dcype  
Alfa Aesar

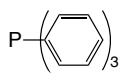

Triphenylphosphine  
PPh<sub>3</sub>  
Sigma Aldrich

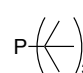

Tri-tert-butylphosphine  
P(t-Bu)<sub>3</sub>  
(Sigma Aldrich)

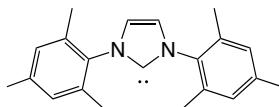

1,3-Bis(2,4,6-trimethylphenyl)-1,3-  
dihydro-2H-imidazol-2-ylidene  
IMes  
Sigma Aldrich

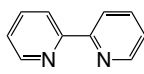

2,2'-Bipyridine  
Bipy  
Alfa Aesar

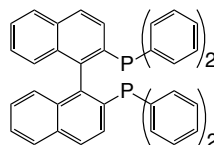

(R)-(+)-2,2'-Bis(diphenyl  
phosphino)-1,1'-binaphthyl  
BINAP  
Alfa Aesar

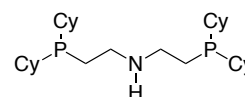

Bis[2-(dicyclohexylphosphino)  
ethyl]amine  
L4  
(Strem Chemical)

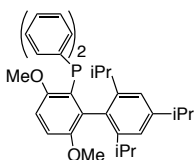

2-(Dicyclohexylphosphino)  
3,6-dimethoxy-2',4',6'-triisopropyl-  
1,1'-biphenyl  
BrettPhos  
Sigma Aldrich

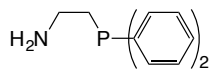

2-(diphenylphosphino)ethylamine  
L5  
Sigma Aldrich

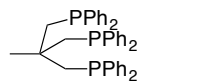

1,1,1-tris(diphenylphosphino  
methyl)ethane  
L6  
Sigma Aldrich

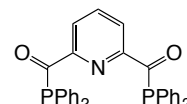

pyridine-2,6-diylbis(diphenyl  
phosphino)methanone  
L7  
(synthesized according to ref<sup>4</sup>)

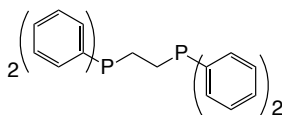

1,2-Bis(diphenylphosphino)ethane  
dppe  
Sigma Aldrich

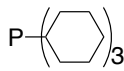

Tricyclohexylphosphine  
PCy<sub>3</sub>  
Sigma Aldrich

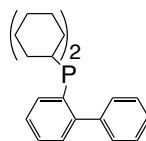

2-(Dicyclohexylphosphino)  
biphenyl  
CyJohnPhos  
Sigma Aldrich

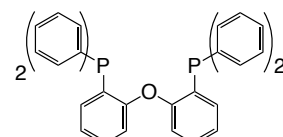

(Oxydi-2,1-  
phenylene)bis(diphenylphosphino)  
DPEPhos  
Sigma Aldrich

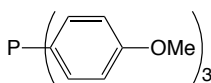

Tris(4-methoxyphenyl)phosphine  
P(4-C<sub>5</sub>H<sub>4</sub>OMe)  
Alfa Aesar

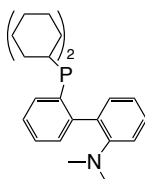

2-Dicyclohexylphosphino-2'-  
(N,N-dimethylamino)biphenyl  
DavePhos  
Matrix Scientific

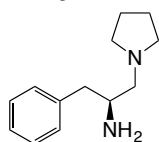

(S)-α-(Phenylmethyl)-1-  
pyrrolidinethanamine  
L8  
Sigma Aldrich

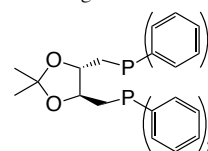

(+)-2,3-O-Isopropylidene-2,3-dihydroxy-  
1,4-bis(diphenylphosphino)butane  
DIOP  
Alfa Aesar

## Alcohols

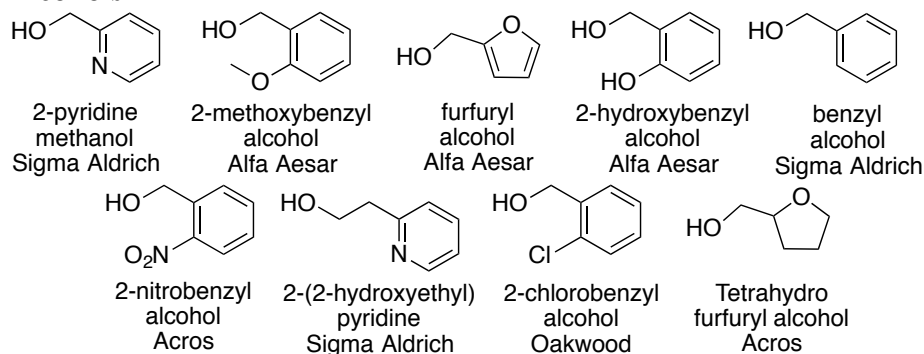

## 3. Synthesis

**3.1. Synthesis of Methyl Palmitate (2).** Palmitic acid (2.99 g, 11.7 mmol, 1.0 equiv) was weighed into a round bottom flask (100 mL). Methanol (~15 mL) was then added to the round bottom and the mixture was stirred at room temperature. Using a syringe, thionyl chloride (0.9 mL, 12.4 mmol, 1.1 equiv) was added dropwise to the reaction mixture. The solution was refluxed overnight (~16 h) at 66 °C. The solvent was removed using a rotary evaporator and the residue was dissolved in ethyl acetate (100 mL). The solution was washed with saturated sodium bicarbonate solution (2 x 50 mL) and brine (1 x 50 mL). The organic layer was then dried with magnesium sulfate, filtered, and concentrated. This process yielded methyl palmitate<sup>2</sup> as a white solid (3.08 g, 97% yield). **<sup>1</sup>H NMR (500 MHz, CDCl<sub>3</sub>):** δ 3.66 (s, 3H, OCH<sub>3</sub>), 2.30 (t, 2H, *J* = 7.6 Hz, C(O)CH<sub>2</sub>), 1.60 (q, 2H, *J* = 7.3 Hz, -CH<sub>2</sub>-), 1.33–1.21 (m, 24H, -CH<sub>2</sub>-), 0.88 (t, 3H, *J* = 6.9 Hz, CH<sub>3</sub>). **<sup>13</sup>C{<sup>1</sup>H} NMR (125 MHz, CDCl<sub>3</sub>):** δ 174.45, 51.55, 34.26, 32.08, 29.84, 29.82, 29.80, 29.75, 29.60, 29.51, 29.41, 29.31, 25.11, 22.84, 14.26. **HRMS:** Calculated *m/z* for C<sub>17</sub>H<sub>34</sub>O<sub>2</sub>Na = 293.2451, found = 293.2447.

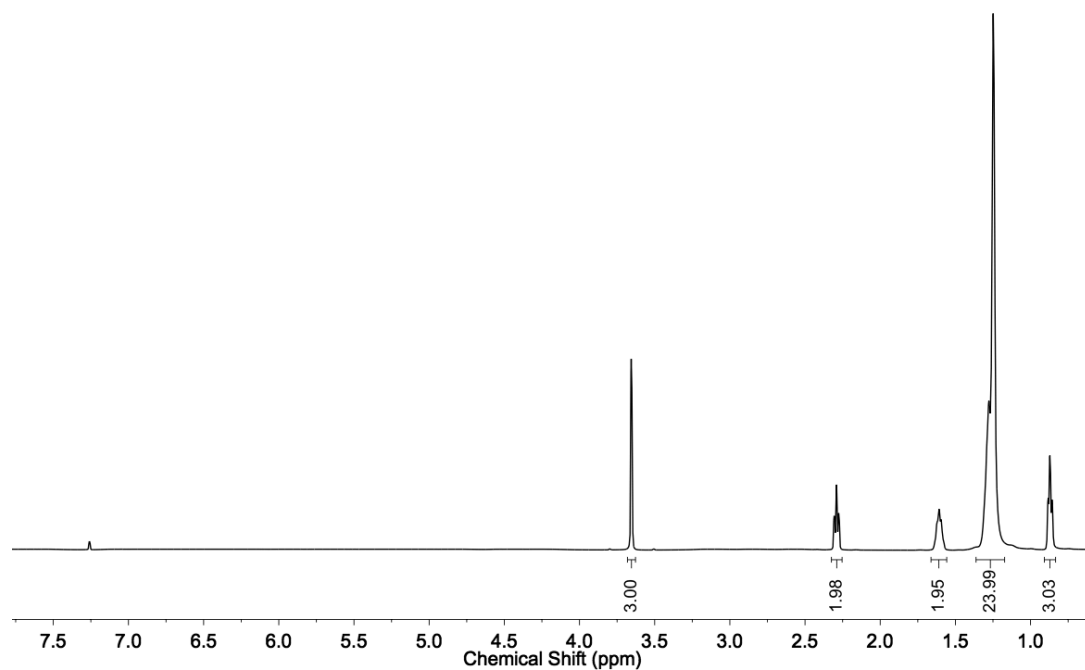

**Figure S1.** <sup>1</sup>H NMR (500 MHz, CDCl<sub>3</sub>) spectrum of methyl palmitate (**2**).

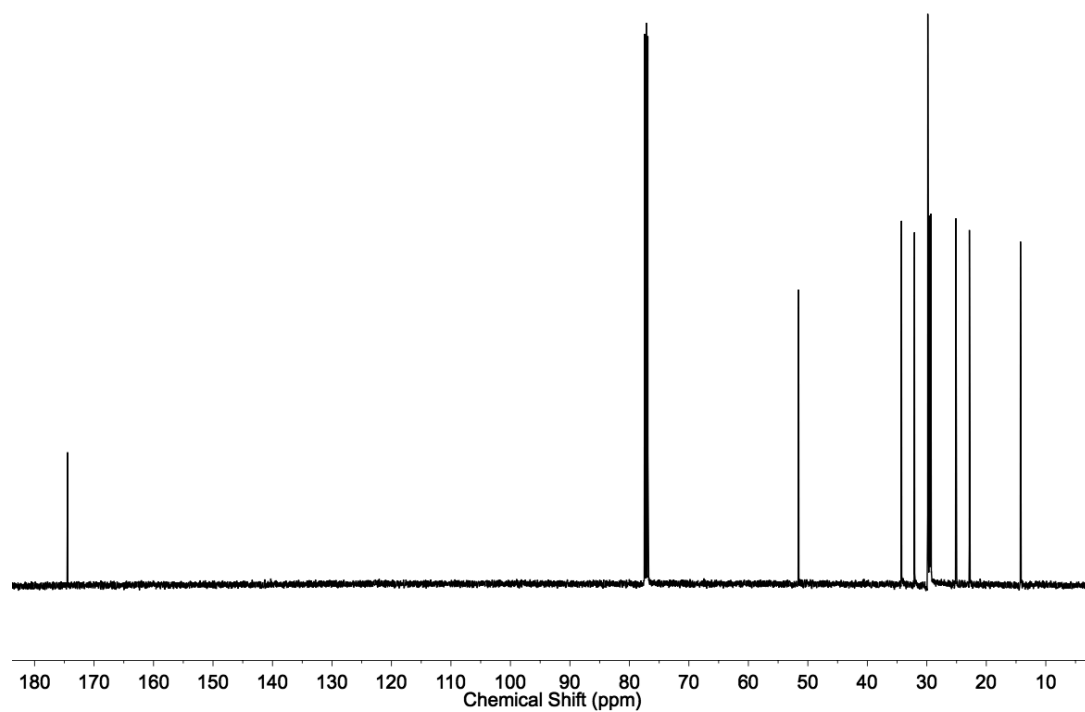

**Figure S2.** <sup>13</sup>C{<sup>1</sup>H} NMR (125 MHz, CDCl<sub>3</sub>) spectrum of methyl palmitate (**2**).



**3.2. Synthesis of Donor Group Esters.** To a stirred solution of palmitic acid (5.0 g, 19.9 mmol, 1.0 equiv) in dry  $\text{CH}_2\text{Cl}_2$  (*ca.* 50 mL) under  $\text{N}_2$  atmosphere was added oxalyl chloride (2.0 mL, 24.0 mmol, 1.2 equiv) dropwise using a syringe followed by DMF (*ca.* 3 drops). The mixture was allowed to stir at room temperature under  $\text{N}_2$  for 3 h. After 3 h, solvent was removed under vacuum. The remaining residue was dissolved in dry THF (*ca.* 100 mL).  $\text{NEt}_3$  (2.7 mL, 19.4 mmol, 1.0 equiv) and alcohol (22.8 mmol, 1.15 equiv) were added. The reaction was allowed to stir at room temperature for *ca.* 48 h. During this time, the reaction mixture showed the presence of a pale yellow precipitate. The reaction mixture was filtered to remove the precipitate and the filtrate was concentrated on a rotatory evaporator. If the ester obtained was not pure (remaining alcohol present as judged by  $^1\text{H}$  NMR spectroscopy), the crude product was dissolved in 10% EtOAc in hexanes and filtered through a pad of silica.

**Pyridin-2-ylmethyl Palmitate (1).** Off-white to tan powder (5.65 g, 82% yield).  $^1\text{H}$  NMR (500 MHz,  $\text{CDCl}_3$ ):  $\delta$  8.61 (d, 1H,  $J = 4.9$  Hz, Ar- $H$ ), 7.73 (t, 1H,  $J = 7.6$  Hz, Ar- $H$ ), 7.37 (d, 1H,  $J = 7.6$  Hz, Ar- $H$ ), 7.25 (t, 1H, Ar- $H$ ), 5.25 (s, 2H, Ar- $\text{CH}_2$ ), 2.42 (t, 2H,  $J = 7.5$  Hz, C(O) $\text{CH}_2$ ), 1.67 (q, 2H,  $J = 7.3$  Hz,  $-\text{CH}_2-$ ), 1.36–1.22 (m, 24H,  $-\text{CH}_2-$ ), 0.88 (t, 3H,  $J = 6.8$  Hz,  $\text{CH}_3$ ).  $^{13}\text{C}\{^1\text{H}\}$  NMR (125 MHz,  $\text{CDCl}_3$ ):  $\delta$  173.60, 156.12, 149.57, 136.86, 122.92, 121.87, 66.75, 34.36, 32.06, 29.83, 29.81, 29.79, 29.73, 29.59, 29.50, 29.39, 29.28, 25.07, 22.83, 14.26. **HRMS:** Calculated  $m/z$  for  $\text{C}_{22}\text{H}_{37}\text{NO}_2\text{Na} = 370.2716$ , found = 370.2710.

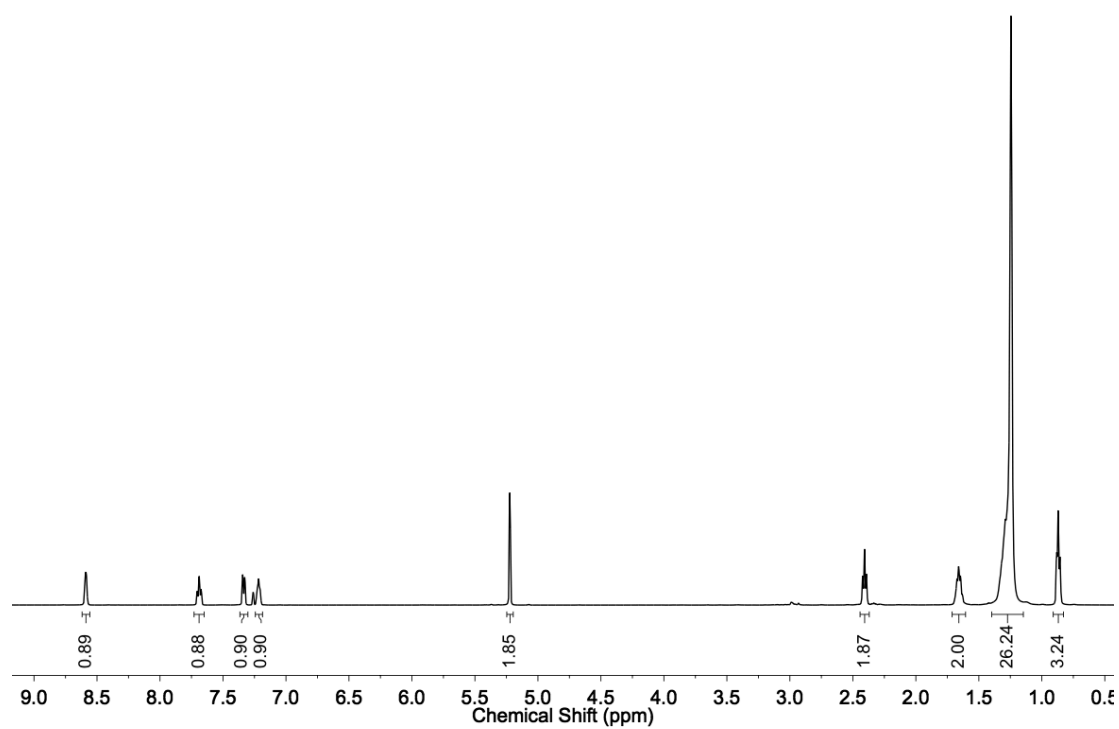

**Figure S3.** <sup>1</sup>H NMR (500 MHz, CDCl<sub>3</sub>) spectrum of pyridin-2-ylmethyl palmitate (**1**).

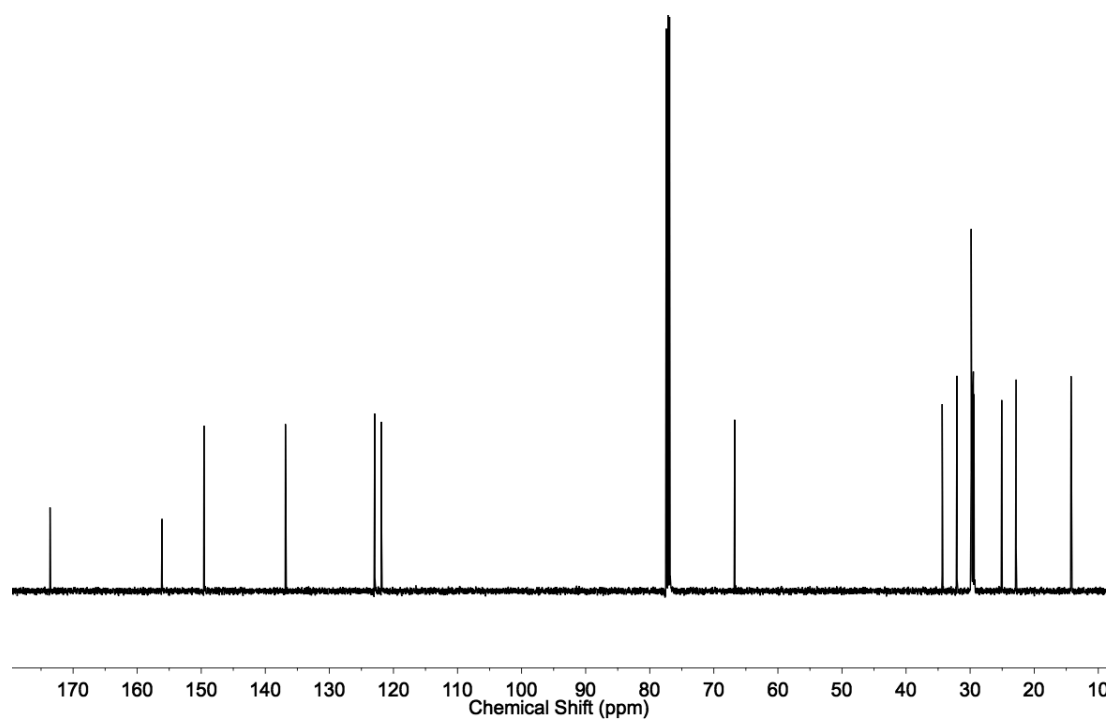

**Figure S4.** <sup>13</sup>C{<sup>1</sup>H} NMR (125 MHz, CDCl<sub>3</sub>) spectrum of pyridin-2-ylmethyl palmitate (**1**).

**Benzyl Palmitate (4).** Performed at a smaller scale (2.0 g palmitic acid) in which all materials are scaled the same as the general method described above. Colorless solid (0.86 g, 32% yield). **<sup>1</sup>H NMR (500 MHz, CDCl<sub>3</sub>):** δ 7.42–7.32 (m, 5H, Ar-*H*), 5.14 (s, 2H, Ar-*CH*<sub>2</sub>), 2.38 (t, 2H, *J* = 7.5 Hz, C(O)*CH*<sub>2</sub>), 1.66 (q, 2H, *J* = 7.4 Hz, -*CH*<sub>2</sub>-), 1.42–1.20 (m, 24H, -*CH*<sub>2</sub>-), 0.91 (t, 3H, *J* = 6.8 Hz, *CH*<sub>3</sub>). **<sup>13</sup>C{<sup>1</sup>H} NMR (125 MHz, CDCl<sub>3</sub>):** δ 173.84, 136.30, 128.67, 128.30, 128.29, 66.19, 34.50, 32.08, 29.85, 29.83, 29.81, 29.74, 29.61, 29.52, 29.40, 29.29, 25.12, 22.85, 14.28. **HRMS:** Calculated *m/z* for C<sub>22</sub>H<sub>38</sub>O<sub>2</sub>Na = 369.2764, found = 369.2751.

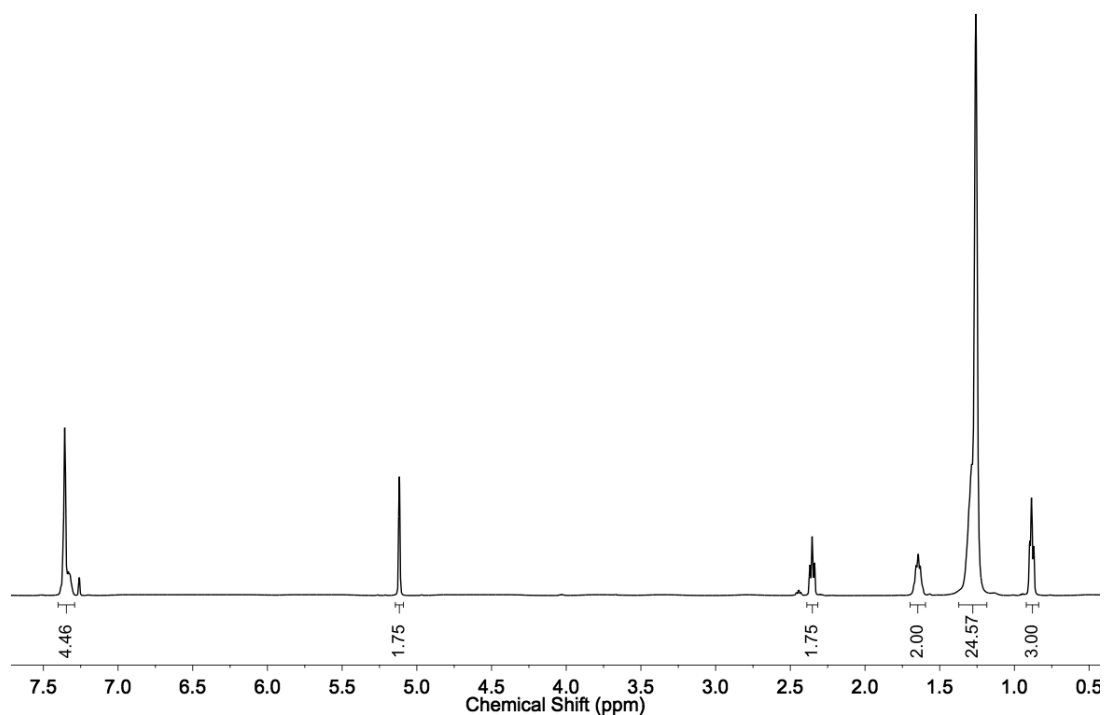

**Figure S5.** <sup>1</sup>H NMR (500 MHz, CDCl<sub>3</sub>) spectrum of benzyl palmitate (**4**).

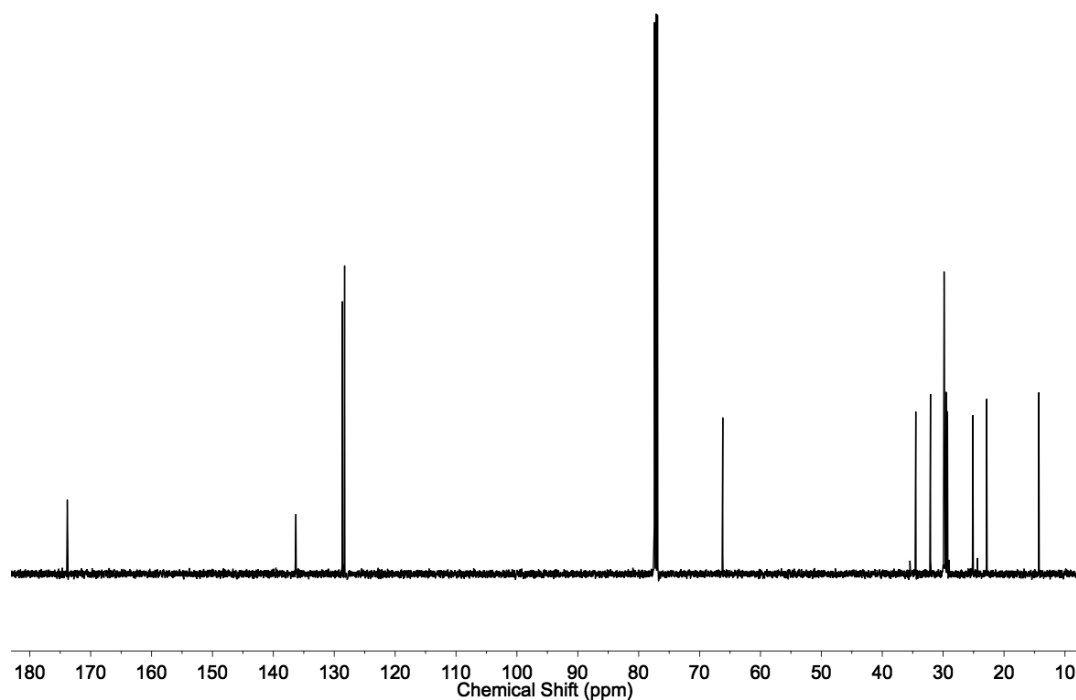

**Figure S6.**  $^{13}\text{C}\{^1\text{H}\}$  NMR (125 MHz,  $\text{CDCl}_3$ ) spectrum of benzyl palmitate (**4**).

## 4. High Throughput Experiment Design

**4.1 High throughput screening (general procedures).** All high throughput experiments were performed using a Freeslate Core Module 3<sup>TM</sup> (CM3) under a  $\text{N}_2$  atmosphere in an MBraun glovebox. Experiments were designed and executed using Library Studio<sup>TM</sup> and Automation Studio<sup>TM</sup> software. Reactions were performed in an Al rack containing 96 x 1mL glass vials. Ligands were dispensed as stock solutions in THF, and metal precursors were dispensed as solids or as solutions or slurries in THF (10–20 mg/mL). The solvent was then removed in vacuo using a ThermoSavant Speedvac vacuum centrifuge. Alcohols were added as liquids and then the esters were added as 0.6–1.5M M solutions in DMPU, robotically. The plates were sealed and heated to 180 °C and allowed to react for 18 hours. At the end of the experiments where olefin production was desired, the arrays were removed from the glovebox, cooled and analyzed for the presence of

olefins using thin-layer chromatography (TLC, silica on glass as stationary phase, hexanes as mobile phase, and imaged using a potassium permanganate in water dye). For conditions considered promising,  $^1\text{H}$  NMR experiments were performed on a Bruker AV500 spectrometer for presence of olefins. At the end of the experiments where donor group esters were the desired product, the arrays were removed from the glovebox, cooled and analyzed for the desired ester with  $^1\text{H}$  NMR spectroscopy.

#### 4.2. Results of high throughput screening experiments

**Table S1.** Screening of 24 different metal complexes and 4 ligands for the decarbonylation of **1**.<sup>a</sup>

|                                                      | SIMes<br>+ KO <sup>t</sup> Bu | PCy <sub>3</sub> | Bipy | CyJohnPhos | SIMes<br>+ KO <sup>t</sup> Bu | PCy <sub>3</sub> | Bipy | CyJohnPhos |                                          |
|------------------------------------------------------|-------------------------------|------------------|------|------------|-------------------------------|------------------|------|------------|------------------------------------------|
| [RuCl <sub>2</sub> (CO) <sub>3</sub> ] <sub>2</sub>  |                               |                  |      |            |                               |                  |      |            | PdCl <sub>2</sub>                        |
| [Ru(p-cym)Cl <sub>2</sub> ] <sub>2</sub>             |                               |                  |      |            |                               |                  |      |            | Pd(PPh <sub>3</sub> ) <sub>4</sub>       |
| Ru(COD)(methylallyl) <sub>2</sub>                    |                               |                  |      |            |                               |                  |      |            | Pd <sub>2</sub> (dba) <sub>3</sub>       |
| Cp <sup>*</sup> Ru(COD)Cl                            |                               |                  |      |            |                               |                  |      |            | Ni(OAc) <sub>2</sub>                     |
| FeCl <sub>2</sub>                                    |                               |                  |      |            |                               |                  |      |            | Ni(COD) <sub>2</sub>                     |
| Fe(CO) <sub>3</sub> (PPh <sub>3</sub> ) <sub>2</sub> |                               |                  |      |            |                               |                  |      |            | [Rh(COD)Cl] <sub>2</sub>                 |
| [CpFe(CO) <sub>3</sub> ] <sub>2</sub>                |                               |                  |      |            |                               |                  |      |            | [Rh(COD) <sub>2</sub> ] <sub>2</sub> OTf |
| CoCl <sub>2</sub>                                    |                               |                  |      |            |                               |                  |      |            | VCl <sub>3</sub> (THF) <sub>3</sub>      |
| Co <sub>2</sub> (CO) <sub>8</sub>                    |                               |                  |      |            |                               |                  |      |            | MnCl <sub>2</sub>                        |
| NaCo(CO) <sub>4</sub>                                |                               |                  |      |            |                               |                  |      |            | [Ir(COD)Cl] <sub>2</sub>                 |
| Cr(C <sub>6</sub> H <sub>6</sub> ) <sub>2</sub>      |                               |                  |      |            |                               |                  |      |            | Os <sub>3</sub> (CO) <sub>12</sub>       |
| CrCl <sub>3</sub>                                    |                               |                  |      |            |                               |                  |      |            | Na[CpMo(CO) <sub>3</sub> ]               |

<sup>a</sup>Conditions: pyridin-2-ylmethyl palmitate **1** (0.043 mmol, 1 equiv), metal complex (10 mol % per metal center), and ligand (10 mol %), in DMPU (0.053 mL) were heated at 180 °C for 18 h. Green boxes represent indication of olefin, using TLC, while white boxes had no indication of olefin formation.

**Table S2.** Screening of 8 directing group alcohols and 12 Lewis acids for the transesterification of **2** to directing group esters.<sup>a</sup>

|                                | 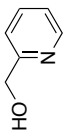 |  |  |  |  |  |  |  |
|--------------------------------|-----------------------------------------------------------------------------------|-----------------------------------------------------------------------------------|-----------------------------------------------------------------------------------|-----------------------------------------------------------------------------------|-----------------------------------------------------------------------------------|-----------------------------------------------------------------------------------|-------------------------------------------------------------------------------------|-------------------------------------------------------------------------------------|
| ZnCl <sub>2</sub>              | 33 %                                                                              |                                                                                   | 9 %                                                                               | 34 %                                                                              | 11 %                                                                              |                                                                                   | 19 %                                                                                | 30 %                                                                                |
| ZnO                            | 28 %                                                                              | NA                                                                                | 10 %                                                                              | 31 %                                                                              | 15 %                                                                              | NA                                                                                |                                                                                     | NA                                                                                  |
| CuCl <sub>2</sub>              |                                                                                   | NA                                                                                | NA                                                                                | NA                                                                                | NA                                                                                | NA                                                                                | NA                                                                                  | NA                                                                                  |
| Sc(OTf) <sub>3</sub>           | 14 %                                                                              |                                                                                   |                                                                                   |                                                                                   |                                                                                   | NA                                                                                | NA                                                                                  | NA                                                                                  |
| InCl <sub>3</sub>              | 29 %                                                                              |                                                                                   |                                                                                   |                                                                                   | 42 %                                                                              | 22 %                                                                              | 31 %                                                                                |                                                                                     |
| MgO                            | 25 %                                                                              |                                                                                   | 27 %                                                                              |                                                                                   | 27 %                                                                              | NA                                                                                | NA                                                                                  | NA                                                                                  |
| CeO <sub>2</sub>               |                                                                                   | NA                                                                                | NA                                                                                | NA                                                                                | NA                                                                                | NA                                                                                | NA                                                                                  | NA                                                                                  |
| TsOH                           |                                                                                   | NA                                                                                | NA                                                                                | NA                                                                                | NA                                                                                | NA                                                                                | NA                                                                                  | NA                                                                                  |
| Al(OTf) <sub>3</sub>           |                                                                                   | NA                                                                                | NA                                                                                | NA                                                                                | NA                                                                                | NA                                                                                | NA                                                                                  | NA                                                                                  |
| LaCl <sub>3</sub>              | 31 %                                                                              |                                                                                   | 37 %                                                                              |                                                                                   | 34 %                                                                              | 24 %                                                                              | 32 %                                                                                |                                                                                     |
| Mol. Sieves                    |                                                                                   | NA                                                                                | NA                                                                                | NA                                                                                | NA                                                                                | NA                                                                                | NA                                                                                  | NA                                                                                  |
| Al <sub>2</sub> O <sub>3</sub> |                                                                                   | NA                                                                                | NA                                                                                | NA                                                                                | NA                                                                                | NA                                                                                | NA                                                                                  | NA                                                                                  |

<sup>a</sup>Conditions: methyl palmitate **2** (0.074 mmol, 1 equiv), directing alcohol (1 equiv), and Lewis acid (10 mol %), in DMPU (0.066 mL) were heated at 180 °C for 18 h. Green boxes represent indication of the directing group ester, using <sup>1</sup>H NMR spectroscopy, at the percent conversion written in the box. Blank white boxes represent conditions with <1 % conversion to the directing group ester, and white boxes with NA indicate reactions not studied by <sup>1</sup>H NMR.

**Table S3.** Screening of 24 different ligands and 4 metal complexes for the decarbonylation of **1**.<sup>a</sup>

|                                        | [CpFe(CO) <sub>3</sub> ] <sub>2</sub> | Ni(COD) <sub>2</sub> | [Rh(COD) <sub>2</sub> ](OTf) | Os <sub>3</sub> (CO) <sub>12</sub> | [CpFe(CO) <sub>3</sub> ] <sub>2</sub> | Ni(COD) <sub>2</sub> | [Rh(COD) <sub>2</sub> ](OTf) | Os <sub>3</sub> (CO) <sub>12</sub> |                                  |
|----------------------------------------|---------------------------------------|----------------------|------------------------------|------------------------------------|---------------------------------------|----------------------|------------------------------|------------------------------------|----------------------------------|
| No Ligand                              |                                       |                      |                              |                                    |                                       |                      |                              |                                    | IMes                             |
| dcype                                  |                                       |                      |                              |                                    |                                       |                      |                              |                                    | dppe                             |
| SIMes + KO <sup>t</sup> Bu             |                                       |                      |                              |                                    |                                       |                      |                              |                                    | BINAP                            |
| P(furyl) <sub>3</sub>                  |                                       |                      |                              |                                    |                                       |                      |                              |                                    | BrettPhos                        |
| DPEPhos                                |                                       |                      |                              |                                    |                                       |                      |                              |                                    | L5                               |
| PCy <sub>3</sub>                       |                                       |                      |                              |                                    |                                       |                      |                              |                                    | L6                               |
| CyJohnPhos                             |                                       |                      |                              |                                    |                                       |                      |                              |                                    | PPh <sub>3</sub>                 |
| Bipy                                   |                                       |                      |                              |                                    |                                       |                      |                              |                                    | DIOP                             |
| L8                                     |                                       |                      |                              |                                    |                                       |                      |                              |                                    | L7                               |
| P(4-C <sub>5</sub> H <sub>4</sub> OMe) |                                       |                      |                              |                                    |                                       |                      |                              |                                    | L4                               |
| DavePhos                               |                                       |                      |                              |                                    |                                       |                      |                              |                                    | P( <sup>t</sup> Bu) <sub>3</sub> |
| L1                                     |                                       |                      |                              |                                    |                                       |                      |                              |                                    | L3                               |

<sup>a</sup>Conditions: pyridin-2-ylmethyl palmitate **1** (0.043 mmol, 1 equiv), metal complex (10 mol % per metal center), and ligand (10 mol %), in DMPU (0.053 mL) were heated at 180 °C for 18 h. Green boxes represent indication of olefin, using TLC, while white boxes had no indication of olefin formation.

**Table S4.** Screening the effect of Lewis acids on the decarbonylation of **1**.<sup>a</sup>

|                                                                        | ZnCl <sub>2</sub> | ZnO | Sc(OTf) <sub>3</sub> | LaCl <sub>3</sub> | InCl <sub>3</sub> | MgO |
|------------------------------------------------------------------------|-------------------|-----|----------------------|-------------------|-------------------|-----|
| [Rh(COD)Cl] <sub>2</sub> /PCy <sub>3</sub>                             |                   |     |                      |                   |                   |     |
| [Rh(COD) <sub>2</sub> ](OTf)/PCy <sub>3</sub>                          |                   |     |                      |                   |                   |     |
| Os <sub>3</sub> (CO) <sub>12</sub> /PCy <sub>3</sub>                   |                   |     |                      |                   |                   |     |
| [CpRu(CO)Cl] <sub>2</sub> /PCy <sub>3</sub>                            |                   |     |                      |                   |                   |     |
| [Ru( <i>p</i> -cymene)Cl <sub>2</sub> ] <sub>2</sub> /PCy <sub>3</sub> |                   |     |                      |                   |                   |     |
| [Ru(CO) <sub>3</sub> Cl <sub>2</sub> ] <sub>2</sub>                    |                   |     |                      |                   |                   |     |
| Ni(COD) <sub>2</sub> /SIMes+KO <sup>t</sup> Bu                         |                   |     |                      |                   |                   |     |
| [CpFe(CO) <sub>3</sub> ] <sub>2</sub> /bipy                            |                   |     |                      |                   |                   |     |

<sup>a</sup>Conditions: pyridin-2-ylmethyl palmitate **1** (0.058 mmol, 1 equiv), metal complex (10 mol % per metal center), ligand (10 mol %), and Lewis acid (20 mol %) in DMPU (0.072mL) were heated at 180 °C for 18 h. Green boxes represent indication of olefin, using TLC, while white boxes had no indication of olefin formation.



**Table S5.** Screening promising metal/ligand combinations, directing group alcohols, and Lewis acids for the dual-catalytic decarbonylation of **2**.<sup>a</sup>

|                                                                                     | Ni(COD) <sub>2</sub> /<br>SIMes + KO <sup>t</sup> Bu | [Rh(COD) <sub>2</sub> ][OTf]<br>/SIMes + KO <sup>t</sup> Bu | [Ru(CO) <sub>3</sub> Cl <sub>2</sub> ] <sub>2</sub> /<br>SIMes+KO <sup>t</sup> Bu | Os <sub>3</sub> (CO) <sub>12</sub> /<br>SIMes + KO <sup>t</sup> Bu | Ni(COD) <sub>2</sub> /<br>DPEPhos | Ni(COD) <sub>2</sub> /<br>PPh <sub>3</sub> |                   |
|-------------------------------------------------------------------------------------|------------------------------------------------------|-------------------------------------------------------------|-----------------------------------------------------------------------------------|--------------------------------------------------------------------|-----------------------------------|--------------------------------------------|-------------------|
| 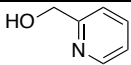   |                                                      |                                                             |                                                                                   |                                                                    |                                   |                                            | ZnCl <sub>2</sub> |
|    |                                                      |                                                             |                                                                                   |                                                                    |                                   |                                            |                   |
|    |                                                      |                                                             |                                                                                   |                                                                    |                                   |                                            |                   |
|    |                                                      |                                                             |                                                                                   |                                                                    |                                   |                                            |                   |
|    |                                                      |                                                             |                                                                                   |                                                                    |                                   |                                            | ZnO               |
|    |                                                      |                                                             |                                                                                   |                                                                    |                                   |                                            |                   |
|   |                                                      |                                                             |                                                                                   |                                                                    |                                   |                                            |                   |
|  |                                                      |                                                             |                                                                                   |                                                                    |                                   |                                            |                   |
|  |                                                      |                                                             |                                                                                   |                                                                    |                                   |                                            | InCl <sub>3</sub> |
|  |                                                      |                                                             |                                                                                   |                                                                    |                                   |                                            |                   |
|  |                                                      |                                                             |                                                                                   |                                                                    |                                   |                                            |                   |
|  |                                                      |                                                             |                                                                                   |                                                                    |                                   |                                            |                   |
|  |                                                      |                                                             |                                                                                   |                                                                    |                                   |                                            | LaCl <sub>3</sub> |
|  |                                                      |                                                             |                                                                                   |                                                                    |                                   |                                            |                   |
|  |                                                      |                                                             |                                                                                   |                                                                    |                                   |                                            |                   |
|  |                                                      |                                                             |                                                                                   |                                                                    |                                   |                                            |                   |

<sup>a</sup>Conditions: methyl palmitate **2** (0.074 mmol, 1 equiv), metal complex (20 mol % per metal center), ligand (20 mol %), directing group alcohol (0.074 mmol, 1 equiv) and Lewis acid (40 mol %) in DMPU (0.065 mL) were heated at 180 °C for 18 h. Green boxes represent indication of olefin, using TLC, while white boxes had no indication of olefin formation.

## 5. Representative Bulk Catalysis Reactions

**Vial bulk reactions.** In a N<sub>2</sub>-filled glovebox, an 8 mL vial equipped with a magnetic stir bar was charged with substrate (0.31 mmol, 1.0 equiv), catalyst (15 mol % metal content), ligand (15 mol %), and Lewis acid (25 mol %). Anhydrous DMPU (0.5 mL) was added and the reaction vial was sealed with a Teflon lined cap. The vial was removed from the glovebox and allowed to stir at 190 °C for 20 h in a preheated oil bath. After 20 h, the vial was removed from the oil bath and allowed to cool to room temperature. The reaction was quenched with 1M HCl (*ca.* 7 mL). The solution was extracted with EtOAc (3 x 1 mL). The organic layer was washed with brine (1 x 5 mL) and then dried over MgSO<sub>4</sub>. MgSO<sub>4</sub> was removed and the solvent was removed via rotatory evaporation. The residue was dissolved in minimal CDCl<sub>3</sub> and an aliquot was used for analysis by <sup>1</sup>H NMR spectroscopy. Conversion to olefins was determined based on unreacted starting material. All conditions were at least run in duplicate. If two runs did not agree within 5% conversion, additional runs were performed until a statistically reasonable result was obtained. All reactions were performed in vials unless otherwise specified.

**Pressure flask reactions.** Reactions were performed analogous to the vial reactions but were performed in 35 mL pressure vessels (Synthware Glassware).

**Reflux apparatus reactions.** In a glovebox, a 25 mL round bottom flask equipped with a magnetic stir bar was charged with reagents appropriate for the condition studied (described within the tables). Anhydrous DMPU was added. An adapter loaded with a drying agent (molecular sieves, drierite, MgSO<sub>4</sub>) was added on top of the round bottom flask in some cases, followed by a reflux condenser and a septum. The setup was brought out of the box and added to a Schlenk line under a positive N<sub>2</sub> pressure. The reaction solution was allowed to stir at 190 °C for 20 h in a preheated oil bath with water flow through the reflux condenser. After 20 h, the reaction setup was

removed from the oil bath and allowed to cool to room temperature. The reaction was worked up analogous to the vial reactions.

## 6. Data for Catalysis Reactions

### 6.1. Decarbonylation

**Scheme S1.** Proposed decarbonylation reactions of esters.

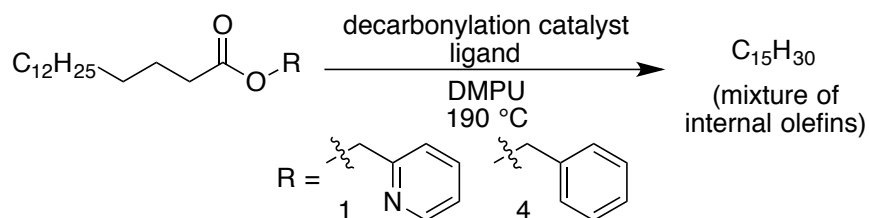

SDSIII-140/10  
SDSIII-140  
PROTON CDCl<sub>3</sub> /opt/data wtosds 6

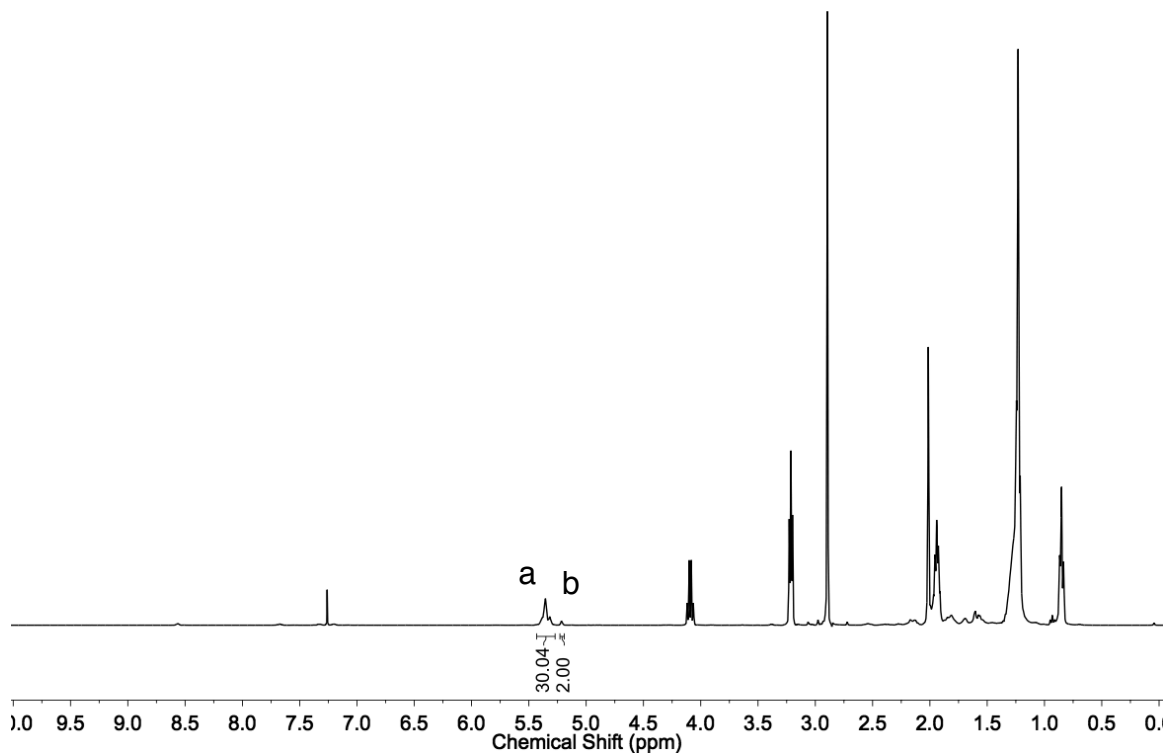

**Figure S7.** Representative <sup>1</sup>H NMR (400 MHz, CDCl<sub>3</sub>) spectrum of products from decarbonylation (from Table S8, entry 11, where a represents the pentadecene products and b represents pyridin-2-ylmethyl palmitate).

**Table S6.** Decarbonylation reactions of pyridin-2-ylmethyl palmitate ester (**1**) with metal complexes (without ligands)<sup>a</sup>

| entry | catalyst                                             | conv. to olefins <sup>b</sup> (%) |
|-------|------------------------------------------------------|-----------------------------------|
| 1     | Ru <sub>3</sub> (CO) <sub>12</sub>                   | 48                                |
| 2     | PdCl <sub>2</sub>                                    | 8                                 |
| 3     | [Rh(COD)Cl] <sub>2</sub>                             | 9                                 |
| 4     | FeCl <sub>2</sub>                                    | <1                                |
| 5     | Fe(PPh <sub>3</sub> ) <sub>2</sub> (CO) <sub>3</sub> | <1                                |
| 6     | Ni(PPh <sub>3</sub> ) <sub>4</sub>                   | <1                                |
| 7     | NiCl <sub>2</sub>                                    | <1                                |
| 8     | Pd(PPh <sub>3</sub> ) <sub>4</sub>                   | <1                                |

<sup>a</sup>Conditions: pyridin-2-ylmethyl palmitate **1** (0.31 mmol, 1 equiv) and catalyst (15% metal content) were heated in DMPU at 190 °C for 20 h. Catalyst % is calculated per metal center (i.e. 15% Ru content = 5 mol % Ru<sub>3</sub>(CO)<sub>12</sub>). <sup>b</sup>Conversion of ester was determined by <sup>1</sup>H NMR spectroscopy.

**Table S7.** Decarbonylation reactions of the pyridin-2-ylmethyl palmitate (**1**) with metal complexes and ligands found to be promising in high throughput studies.<sup>a</sup>

| entry | catalyst                                                          | ligand                | conv. to olefins <sup>b</sup> (%) |
|-------|-------------------------------------------------------------------|-----------------------|-----------------------------------|
| 1     | Ru <sub>3</sub> (CO) <sub>12</sub>                                | PPh <sub>3</sub>      | 65                                |
| 2     | Ru <sub>3</sub> (CO) <sub>12</sub>                                | DPPE                  | <1                                |
| 3     | Ru <sub>3</sub> (CO) <sub>12</sub>                                | SIMes <sup>c</sup>    | 46                                |
| 4     | Ru <sub>3</sub> (CO) <sub>12</sub>                                | DPEPhos               | 21                                |
| 5     | Ru <sub>3</sub> (CO) <sub>12</sub>                                | PCy <sub>3</sub>      | 72                                |
| 6     | [Ru <sub>2</sub> (CO) <sub>3</sub> Cl <sub>2</sub> ] <sub>2</sub> | PCy <sub>3</sub>      | <1                                |
| 7     | [Ru <sub>2</sub> (CO) <sub>3</sub> Cl <sub>2</sub> ] <sub>2</sub> | SIMes <sup>c</sup>    | 8                                 |
| 8     | [Rh(COD) <sub>2</sub> ][OTf]                                      | PCy <sub>3</sub>      | <1                                |
| 9     | [Rh(COD) <sub>2</sub> ][OTf]                                      | DPEPhos               | 4                                 |
| 10    | [Rh(COD) <sub>2</sub> ][OTf]                                      | CyJohnPhos            | 6                                 |
| 11    | [Rh(COD) <sub>2</sub> ][OTf]                                      | DavePhos              | <1                                |
| 12    | [Rh(COD) <sub>2</sub> ][OTf]                                      | BINAP                 | 5                                 |
| 13    | [Rh(COD) <sub>2</sub> ][OTf]                                      | L5                    | <1                                |
| 14    | [Rh(COD) <sub>2</sub> ][OTf]                                      | L3                    | 18                                |
| 15    | [Rh(COD) <sub>2</sub> ][OTf]                                      | dcype                 | 29                                |
| 16    | [Rh(COD)Cl] <sub>2</sub>                                          | PCy <sub>3</sub>      | 15                                |
| 17    | Pd(PPh <sub>3</sub> ) <sub>4</sub>                                | SIMes <sup>c</sup>    | <1                                |
| 18    | Ni(COD) <sub>2</sub>                                              | PCy <sub>3</sub>      | <1                                |
| 19    | Ni(COD) <sub>2</sub>                                              | SIMes <sup>c</sup>    | 2                                 |
| 20    | Ni(COD) <sub>2</sub>                                              | CyJohnPhos            | 4                                 |
| 21    | Ni(COD) <sub>2</sub>                                              | dcype                 | 5                                 |
| 22    | Ni(COD) <sub>2</sub>                                              | PPh <sub>3</sub>      | 2                                 |
| 23    | Ni(COD) <sub>2</sub>                                              | L3                    | 2                                 |
| 24    | Ni(COD) <sub>2</sub>                                              | dppe                  | 5                                 |
| 25    | Ni(COD) <sub>2</sub>                                              | BINAP                 | <1                                |
| 26    | Ni(COD) <sub>2</sub>                                              | DPEPhos               | <1                                |
| 27    | Ni(COD) <sub>2</sub>                                              | DIOP                  | 9                                 |
| 28    | Ni(COD) <sub>2</sub>                                              | L6                    | 9                                 |
| 29    | Ni(COD) <sub>2</sub>                                              | P(furyl) <sub>3</sub> | 9                                 |

<sup>a</sup>Conditions: pyridin-2-ylmethyl palmitate **1** (0.31 mmol, 1 equiv), catalyst (15% metal content), and ligand (15 mol %) were heated in DMPU at 190 °C for 20 h. Catalyst % is calculated per metal center (i.e. 15% Ru content = 5 mol % Ru<sub>3</sub>(CO)<sub>12</sub>). <sup>b</sup>Conversion of ester was determined by <sup>1</sup>H NMR spectroscopy. <sup>c</sup>SIMes generated by the deprotonation of 1,3-dimesitylimidazolium chloride with 1 equiv KO<sup>t</sup>Bu.

**Table S8.** Control decarbonylation reactions of **1** or **4** under various conditions with the Ru<sub>3</sub>(CO)<sub>12</sub>/PCy<sub>3</sub> catalyst system.<sup>a</sup>

| entry             | substrate | conv. to olefins <sup>b</sup> (%) |
|-------------------|-----------|-----------------------------------|
| 1 <sup>c</sup>    | <b>1</b>  | 43                                |
| 2 <sup>d</sup>    | <b>1</b>  | 92                                |
| 3                 | <b>4</b>  | 2                                 |
| 4 <sup>d</sup>    | <b>4</b>  | 2                                 |
| 5 <sup>e</sup>    | <b>1</b>  | 69                                |
| 6 <sup>f</sup>    | <b>1</b>  | 62                                |
| 7 <sup>g</sup>    | <b>1</b>  | 64                                |
| 8 <sup>h</sup>    | <b>1</b>  | 53                                |
| 9 <sup>i</sup>    | <b>1</b>  | 12                                |
| 10 <sup>i,j</sup> | <b>1</b>  | 51                                |
| 11 <sup>k</sup>   | <b>1</b>  | 95                                |

<sup>a</sup>Conditions unless stated otherwise: substrate **1** or **4** (0.31 mmol, 1 equiv), Ru<sub>3</sub>(CO)<sub>12</sub> (15% metal content), and PCy<sub>3</sub> (15 mol %) were heated in DMPU at 190 °C for 20 h. Catalyst % is calculated per metal center (i.e. 15% Ru content = 5 mol % Ru<sub>3</sub>(CO)<sub>12</sub>). <sup>b</sup>Conversion of ester was determined by <sup>1</sup>H NMR spectroscopy. <sup>c</sup>20 mol % 2-pyridinemethanol was added. <sup>d</sup>25 mol % ZnCl<sub>2</sub> was added. <sup>e</sup>Three molecular sieves were added to the reaction vessel (4Å). <sup>f</sup>25 mol % ZnO was added. <sup>g</sup>25 mol % LaCl<sub>3</sub> was added. <sup>h</sup>30 mol % PCy<sub>3</sub> was added. <sup>i</sup>Lower catalyst and ligand concentrations were used (5 mol % Ru and PCy<sub>3</sub>). <sup>j</sup>Reaction was heated for 40 hours. <sup>k</sup>Reaction performed in a 35 mL pressure vessel.

**Table S9.** Control decarbonylation reactions of **1** in the presence of MeOH.<sup>a</sup>

| entry          | catalyst                           | ligand           | Conversion to olefins/methyl ester (%) <sup>b</sup> |
|----------------|------------------------------------|------------------|-----------------------------------------------------|
| 1              | Ru <sub>3</sub> (CO) <sub>12</sub> | PCy <sub>3</sub> | 28 / 42                                             |
| 2 <sup>c</sup> | Ru <sub>3</sub> (CO) <sub>12</sub> | PCy <sub>3</sub> | 25 / 69                                             |
| 3 <sup>c</sup> | none                               | none             | <1 / 53                                             |

<sup>a</sup>Conditions: pyridin-2-ylmethyl palmitate **1** (0.31 mmol, 1 equiv), catalyst (15% metal content), ligand (15 mol %), and MeOH (1 equiv) were heated in DMPU at 190 °C for 20 h. Catalyst % is calculated per metal center (i.e. 15% Ru content = 5 mol % Ru<sub>3</sub>(CO)<sub>12</sub>). <sup>b</sup>Conversion of ester was determined by <sup>1</sup>H NMR spectroscopy. <sup>c</sup>25 mol % ZnCl<sub>2</sub> was added.

## 6.2. Transesterification

**Scheme S2.** Proposed transesterification of methyl palmitate (**2**) with different alcohols to form new esters with donor groups.

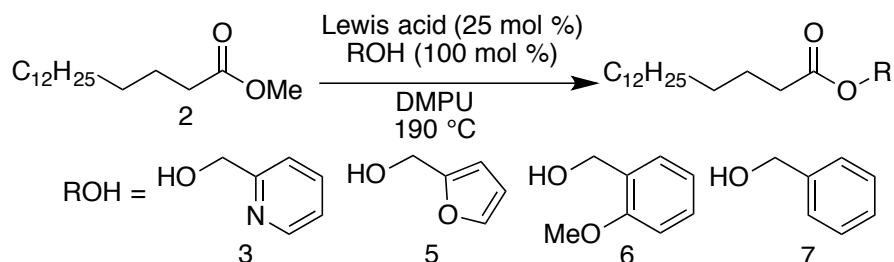

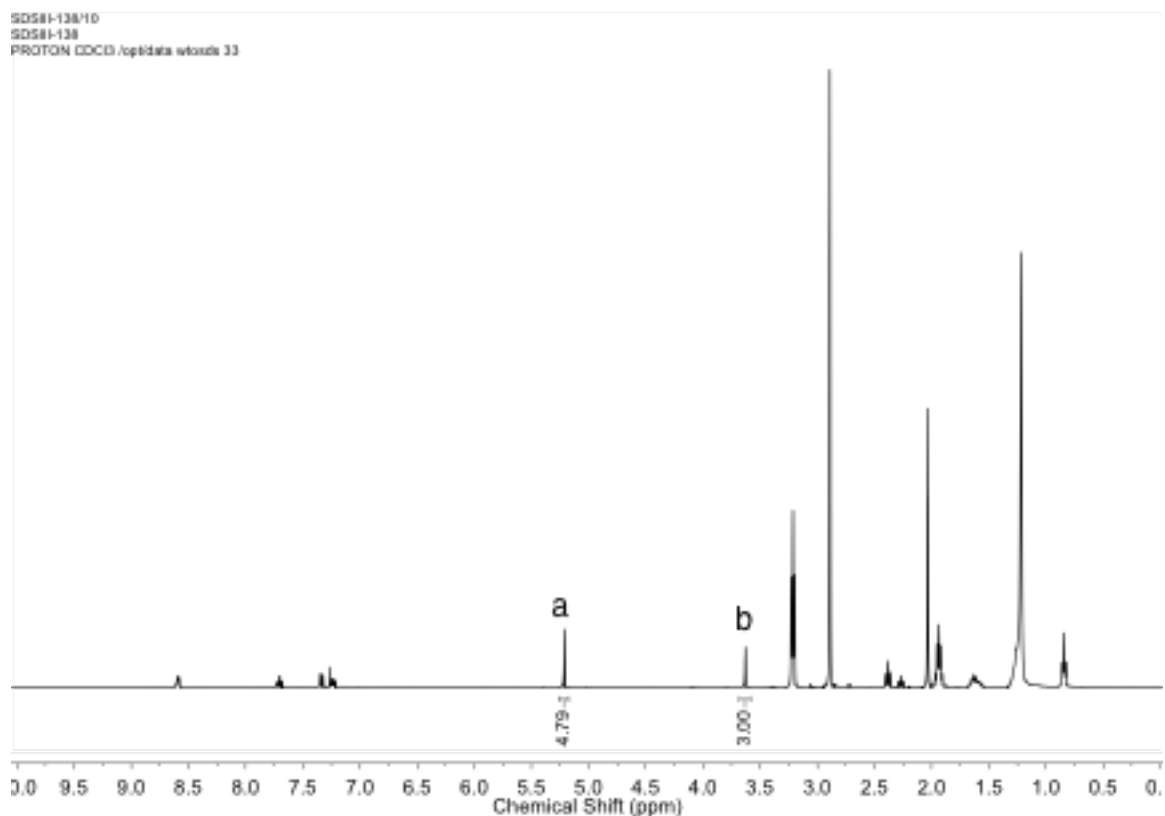

**Figure S8.** Representative  $^1\text{H}$  NMR (400 MHz,  $\text{CDCl}_3$ ) spectrum of products from transesterification (Table S11, entry 8, where a represents pyridin-2-ylmethyl palmitate and b represents methyl palmitate).

**Table S10.** Transesterification of methyl palmitate (**2**) and 2-pyridinemethanol (**3**) with various Lewis acids.<sup>a</sup>

| entry | Lewis Acid                         | conv. to <b>1</b> <sup>b</sup> (%) |
|-------|------------------------------------|------------------------------------|
| 1     | none                               | 34                                 |
| 2     | $\text{ZnCl}_2$                    | 40                                 |
| 3     | $\text{ZnO}$                       | 37                                 |
| 4     | $\text{LaCl}_3$                    | 39                                 |
| 5     | $\text{InCl}_3$                    | 12                                 |
| 6     | $\text{LiCl}$                      | 32                                 |
| 7     | $\text{KI}$                        | 20                                 |
| 8     | $\text{NaOAc}$                     | 45                                 |
| 9     | $\text{Al}(\text{O}^i\text{Pr})_3$ | 26                                 |

<sup>a</sup>Conditions: methyl palmitate **2** (0.31 mmol, 1 equiv), Lewis acid (25 mol %), and 2-pyridinemethanol **3** (100 mol %) in DMPU (0.5 mL) were heated at 190 °C for 20 h. <sup>b</sup>Conversion of methyl ester was determined by  $^1\text{H}$  NMR spectroscopy.

**Table S11.** Control reactions for the transesterification of methyl palmitate (**2**) with various alcohols.<sup>a</sup>

| entry           | Lewis Acid        | alcohol  | time (h) | conv. to donor ester <sup>b</sup> (%) |
|-----------------|-------------------|----------|----------|---------------------------------------|
| 1               | ZnCl <sub>2</sub> | <b>3</b> | 1 h      | <1                                    |
| 2               | ZnCl <sub>2</sub> | <b>3</b> | 2 h      | 16                                    |
| 3               | ZnCl <sub>2</sub> | <b>3</b> | 4 h      | 18                                    |
| 4               | ZnCl <sub>2</sub> | <b>3</b> | 20 h     | 40                                    |
| 5 <sup>c</sup>  | none              | <b>3</b> | 20 h     | 8                                     |
| 6 <sup>c</sup>  | ZnCl <sub>2</sub> | <b>3</b> | 20 h     | 16                                    |
| 7 <sup>d</sup>  | ZnCl <sub>2</sub> | <b>3</b> | 20 h     | 50(44–61) <sup>e</sup>                |
| 8 <sup>f</sup>  | ZnCl <sub>2</sub> | <b>3</b> | 20 h     | 67                                    |
| 9 <sup>g</sup>  | ZnCl <sub>2</sub> | <b>3</b> | 20 h     | 4                                     |
| 10 <sup>h</sup> | ZnCl <sub>2</sub> | <b>3</b> | 20 h     | 32                                    |
| 11              | ZnCl <sub>2</sub> | <b>7</b> | 20 h     | 53                                    |
| 12              | none              | <b>7</b> | 20 h     | 27                                    |

<sup>a</sup>Conditions unless specified otherwise: methyl palmitate **2** (0.31 mmol, 1 equiv), Lewis acid (25 mol %), and alcohol (100 mol %) in DMPU (0.5 mL) were heated at 190 °C for 20 h. <sup>b</sup>Conversion of methyl ester was determined by <sup>1</sup>H NMR spectroscopy. <sup>c</sup>20 mol % 2-pyridinemethanol **3** added. <sup>d</sup>Three molecular sieves were added to the reaction vessel (4Å). <sup>e</sup>Reactions with molecular sieves were often inconsistent, and therefore the average conversion (range of conversions) is reported. <sup>f</sup>Reaction performed in a 35 mL pressure vessel. <sup>g</sup>Reaction heated at 100 °C. <sup>h</sup>Reaction heated at 150 °C.

**Table S12.** Transesterification reactions of methyl palmitate (**2**) with various alcohols and zinc Lewis acids.<sup>a</sup>

| entry | Lewis Acid        | alcohol  | time (h) | temp (°C) | conv. to donor ester <sup>b</sup> (%) |
|-------|-------------------|----------|----------|-----------|---------------------------------------|
| 1     | ZnCl <sub>2</sub> | <b>5</b> | 20 h     | 190       | 5                                     |
| 2     | ZnCl <sub>2</sub> | <b>5</b> | 20 h     | 150       | 10                                    |
| 3     | ZnCl <sub>2</sub> | <b>6</b> | 20 h     | 190       | 44                                    |
| 4     | ZnCl <sub>2</sub> | <b>6</b> | 20 h     | 150       | 12                                    |
| 5     | ZnO               | <b>3</b> | 20 h     | 190       | 40                                    |
| 6     | ZnO               | <b>3</b> | 20 h     | 150       | 28                                    |
| 7     | ZnO               | <b>5</b> | 20 h     | 190       | 36                                    |
| 8     | ZnO               | <b>5</b> | 20 h     | 150       | 15                                    |
| 9     | ZnO               | <b>6</b> | 20 h     | 190       | 36                                    |
| 10    | ZnO               | <b>6</b> | 20 h     | 150       | 31                                    |
| 11    | ZnO               | <b>6</b> | 50 h     | 190       | 69                                    |

<sup>a</sup>Conditions unless specified otherwise: methyl palmitate **2** (0.31 mmol, 1 equiv), Lewis acid (25 mol %), and alcohol (100 mol %) in DMPU (0.5 mL) were heated at 190 °C for 20 h. <sup>b</sup>Conversion of methyl ester was determined by <sup>1</sup>H NMR spectroscopy.



**Table S13.** Transesterification reactions of methyl palmitate (**2**) with various alcohols and Lewis acids (InCl<sub>3</sub> and LaCl<sub>3</sub>).<sup>a</sup>

| entry | Lewis Acid        | alcohol  | time (h) | temp (°C) | conv. to donor ester <sup>b</sup> (%) |
|-------|-------------------|----------|----------|-----------|---------------------------------------|
| 1     | LaCl <sub>3</sub> | <b>3</b> | 20 h     | 190       | 30                                    |
| 2     | LaCl <sub>3</sub> | <b>3</b> | 20 h     | 150       | 25                                    |
| 3     | LaCl <sub>3</sub> | <b>5</b> | 20 h     | 190       | 14                                    |
| 4     | LaCl <sub>3</sub> | <b>5</b> | 20 h     | 150       | 26                                    |
| 5     | LaCl <sub>3</sub> | <b>6</b> | 20 h     | 190       | 60                                    |
| 6     | LaCl <sub>3</sub> | <b>6</b> | 20 h     | 150       | 38                                    |
| 7     | LaCl <sub>3</sub> | <b>6</b> | 50 h     | 190       | 61                                    |
| 8     | InCl <sub>3</sub> | <b>3</b> | 20 h     | 190       | 12                                    |
| 9     | InCl <sub>3</sub> | <b>3</b> | 20 h     | 150       | 20                                    |
| 10    | InCl <sub>3</sub> | <b>5</b> | 20 h     | 190       | <1                                    |
| 11    | InCl <sub>3</sub> | <b>5</b> | 20 h     | 150       | <1                                    |
| 12    | InCl <sub>3</sub> | <b>6</b> | 20 h     | 190       | 1                                     |
| 13    | InCl <sub>3</sub> | <b>6</b> | 20 h     | 150       | 11                                    |

<sup>a</sup>Conditions: methyl palmitate **2** (0.31 mmol, 1 equiv), Lewis acid (25 mol %), and alcohol (100 mol %) in DMPU (0.5 mL) were heated at 190 °C for 20 h. <sup>b</sup>Conversion of methyl ester was determined by <sup>1</sup>H NMR spectroscopy.

### 6.3. Dual Catalysis

**Scheme S3.** Proposed dual-catalytic decarbonylation of methyl palmitate (**2**) to form olefin feedstocks.

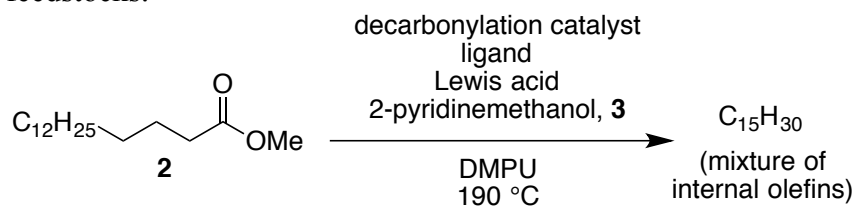

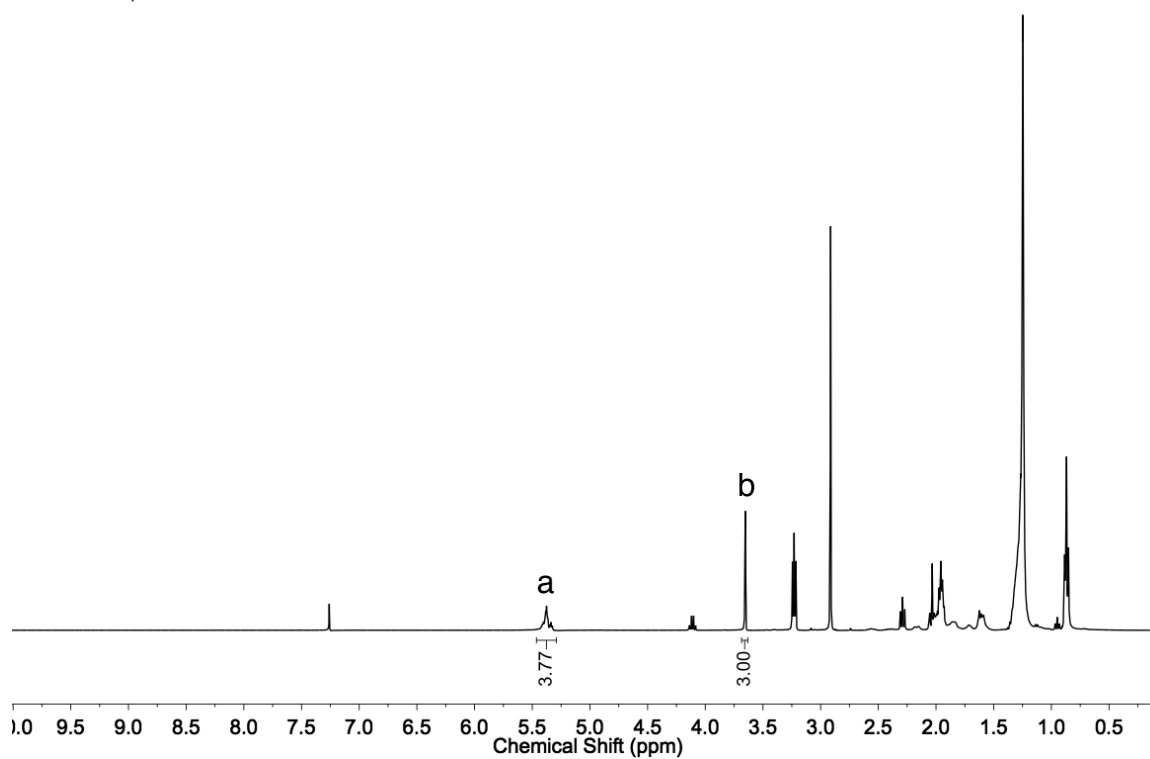

**Figure S9.** Representative <sup>1</sup>H NMR (400 MHz, CDCl<sub>3</sub>) spectrum of products from dual catalysis (from Table S16, entry 1, where a represents the pentadecene products and b represents methyl palmitate).

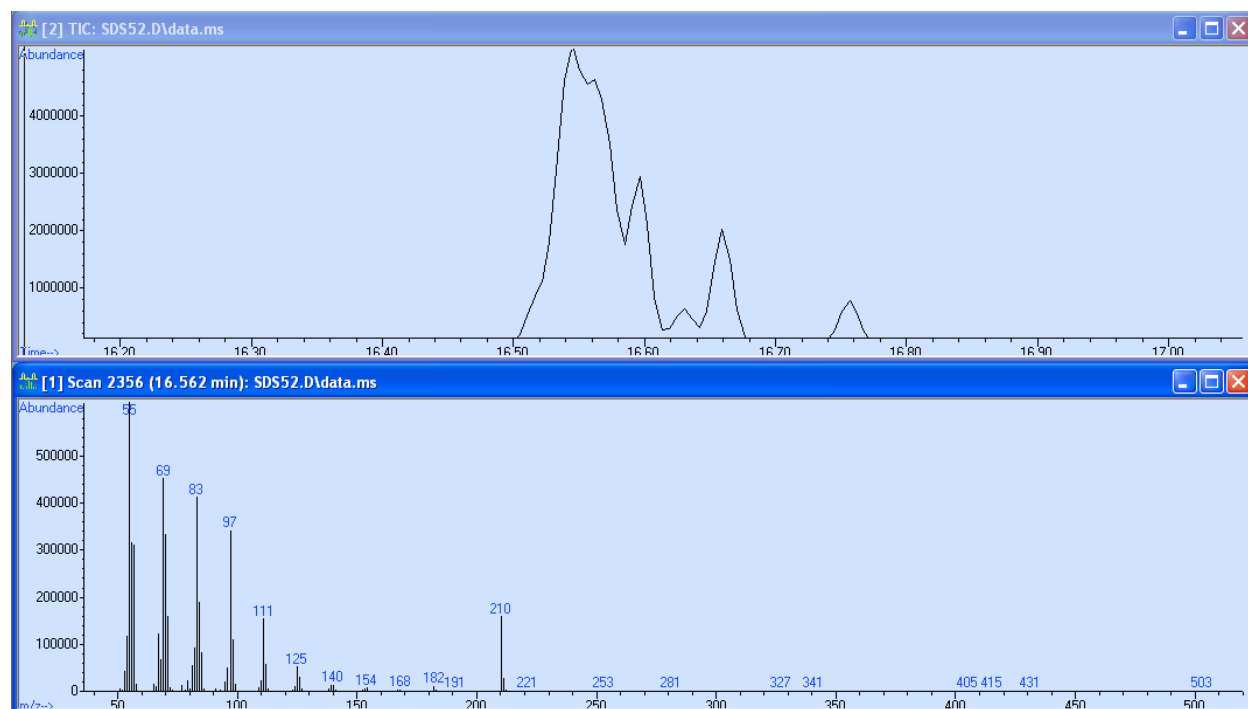

**Figure S10.** Representative GC-MS of olefin products from dual catalysis (from Table S16, entry 1).

**Table S14.** Time study of the dual-catalytic decarbonylation of methyl palmitate (**2**) with 2-pyridinemethanol (**3**).<sup>a</sup>

| entry | time (h) | conv. to olefin <sup>b</sup> (%) | conv. to <b>1</b> <sup>b</sup> (%) |
|-------|----------|----------------------------------|------------------------------------|
| 1     | 2        | 21                               | 3                                  |
| 2     | 4        | 27                               | <1                                 |
| 3     | 6        | 30                               | 1                                  |
| 4     | 8        | 32                               | 1                                  |
| 5     | 14       | 40                               | <1                                 |
| 6     | 20       | 38                               | <1                                 |
| 7     | 24       | 31                               | <1                                 |
| 8     | 30       | 31                               | <1                                 |
| 9     | 40       | 43                               | <1                                 |

<sup>a</sup>Conditions: methyl palmitate **2** (0.31 mmol, 1 equiv), ZnCl<sub>2</sub> (25 mol %), Ru<sub>3</sub>(CO)<sub>12</sub> (15 mol % per metal center), PCy<sub>3</sub> (15 mol %), and 2-pyridinemethanol **3** (20 mol %) in DMPU (0.5 mL) were heated at 190 °C. Catalyst % is calculated per metal center (i.e. 15% Ru content = 5 mol % Ru<sub>3</sub>(CO)<sub>12</sub>). <sup>b</sup>Conversion of methyl ester was determined by <sup>1</sup>H NMR spectroscopy.

**Table S15.** Control reactions of the dual-catalytic decarbonylation of methyl palmitate (**2**).<sup>a</sup>

| entry             | Lewis Acid<br>(% loading)   | alcohol<br>(% loading) | conv. to<br>olefin <sup>b</sup> (%) | conv. to donor<br>ester <sup>b</sup> (%) |
|-------------------|-----------------------------|------------------------|-------------------------------------|------------------------------------------|
| 1                 | none                        | none                   | <1                                  | <1                                       |
| 2                 | ZnCl <sub>2</sub> (25 %)    | none                   | 2                                   | <1                                       |
| 3                 | none                        | <b>3</b> (20 %)        | <1                                  | <1                                       |
| 4                 | ZnCl <sub>2</sub> (50 %)    | none                   | <1                                  | <1                                       |
| 5 <sup>c</sup>    | ZnCl <sub>2</sub> (25 %)    | <b>3</b> (20 %)        | 21                                  | <1                                       |
| 6 <sup>d</sup>    | ZnCl <sub>2</sub> (25 %)    | <b>3</b> (20 %)        | 44(34– 49) <sup>e</sup>             | <1                                       |
| 7 <sup>d,f</sup>  | ZnCl <sub>2</sub> (25 %)    | <b>3</b> (20 %)        | 52                                  | <1                                       |
| 8                 | none                        | <b>3</b> (100 %)       | 12                                  | 6                                        |
| 9                 | ZnCl <sub>2</sub> (25 %)    | <b>7</b> (20 %)        | <1                                  | 5                                        |
| 10                | ZnCl <sub>2</sub> (25 %)    | <b>3</b> (40 %)        | 38                                  | 2                                        |
| 11                | ZnCl <sub>2</sub> (25 %)    | <b>3</b> (80 %)        | 21                                  | 9                                        |
| 12 <sup>g</sup>   | ZnCl <sub>2</sub> (25 %)    | <b>3</b> (80 %)        | 37                                  | 2                                        |
| 13                | ZnCl <sub>2</sub> (25 %)    | <b>3</b> (120 %)       | 16                                  | 19                                       |
| 14 <sup>g</sup>   | ZnCl <sub>2</sub> (25 %)    | <b>3</b> (120 %)       | 54                                  | 0                                        |
| 15                | ZnCl <sub>2</sub> (1 equiv) | <b>3</b> (20 %)        | 38                                  | <1                                       |
| 16                | ZnCl <sub>2</sub> (2 equiv) | <b>3</b> (20 %)        | <1                                  | <1                                       |
| 17 <sup>d,g</sup> | ZnCl <sub>2</sub> (25 %)    | <b>3</b> (20 %)        | 50(37– 63) <sup>e</sup>             | <1                                       |
| 18 <sup>h</sup>   | ZnCl <sub>2</sub> (25 %)    | <b>3</b> (20 %)        | 35                                  | <1                                       |
| 19 <sup>i</sup>   | ZnCl <sub>2</sub> (25 %)    | <b>3</b> (20 %)        | 33                                  | <1                                       |

<sup>a</sup>Conditions unless specified otherwise: methyl palmitate **2** (0.31 mmol, 1 equiv), ZnCl<sub>2</sub> (25 mol %), Ru<sub>3</sub>(CO)<sub>12</sub> (15 mol % per metal center), PCy<sub>3</sub> (15 mol %), and alcohol (20 mol %) in DMPU (0.5 mL) were heated at 190 °C for 20 h. Catalyst % is calculated per metal center (i.e. 15% Ru content = 5 mol % Ru<sub>3</sub>(CO)<sub>12</sub>). <sup>b</sup>Conversion of methyl ester was determined by <sup>1</sup>H NMR spectroscopy. <sup>c</sup>No ligand was used. <sup>d</sup>Three molecular sieves were added to the reaction vessel (4Å). <sup>e</sup>Reactions with molecular sieves were often inconsistent, and therefore the average conversion (range of conversions) is reported. <sup>f</sup>30 mol % Ru<sub>3</sub>(CO)<sub>12</sub> and PCy<sub>3</sub> were used. <sup>g</sup>Reaction heated for 40 h. <sup>h</sup>Reaction was conducted in an approx. 25 mL Schlenk flask, which was purged with CO gas and sealed prior to heating. <sup>i</sup>Reaction was conducted in a sealed approx. 25 mL Schlenk flask.

**Table S16.** Dual-catalytic decarbonylation of methyl palmitate (**2**) in a 35 mL pressure vessel.<sup>a</sup>

| entry            | conv. to olefin <sup>b</sup> (%) | conv. to <b>1</b> <sup>b</sup> (%) |
|------------------|----------------------------------|------------------------------------|
| 1                | 64                               | <1                                 |
| 2 <sup>c</sup>   | 48(22–85) <sup>d</sup>           | <1                                 |
| 3 <sup>e</sup>   | 49                               | <1                                 |
| 4 <sup>f</sup>   | 36                               | <1                                 |
| 5 <sup>c,f</sup> | 36(31–42) <sup>d</sup>           | 6                                  |

<sup>a</sup>Conditions unless specified otherwise: methyl palmitate **2** (0.31 mmol, 1 equiv), ZnCl<sub>2</sub> (25 mol %), Ru<sub>3</sub>(CO)<sub>12</sub> (15 mol % per metal center), PCy<sub>3</sub> (15 mol %), and 2-pyridinemethanol **3** (20 mol %) in DMPU (0.5 mL) were heated at 190 °C for 20 h. Catalyst % is calculated per metal center (i.e. 15% Ru content = 5 mol % Ru<sub>3</sub>(CO)<sub>12</sub>). <sup>b</sup>Conversion of methyl ester was determined by <sup>1</sup>H NMR spectroscopy. <sup>c</sup>Three molecular sieves were added to the reaction vessel (4Å). <sup>d</sup>Reactions with molecular sieves were often inconsistent, and therefore the average conversion (range of conversions) is reported. <sup>e</sup>Reactions were heated for 40 h. <sup>f</sup>Reactions were at 4x the standard scale (1.24 mmol of **2**).

**Table S17.** Dual-catalytic decarbonylation of methyl palmitate **2** in a 25 mL round bottom flask with a reflux condenser and a drying agent above the reaction solution.<sup>a</sup>

| entry          | Drying agent above reaction solution | conv. to olefin <sup>b</sup> (%) | conv. to <b>1</b> <sup>b</sup> (%) |
|----------------|--------------------------------------|----------------------------------|------------------------------------|
| 1              | none                                 | 47                               | <1                                 |
| 2 <sup>c</sup> | none                                 | 31(14–52) <sup>d</sup>           | <1                                 |
| 3 <sup>e</sup> | none                                 | 38                               | <1                                 |
| 4              | Drierite                             | 51(36–62) <sup>d</sup>           | <1                                 |
| 5              | MgSO <sub>4</sub>                    | 44(36–48) <sup>d</sup>           | <1                                 |
| 6              | Molecular Sieves                     | 51(41–57) <sup>d</sup>           | <1                                 |

<sup>a</sup>Conditions unless specified otherwise: methyl palmitate **2** (0.31 mmol, 1 equiv), ZnCl<sub>2</sub> (25 mol %), Ru<sub>3</sub>(CO)<sub>12</sub> (15 mol % per metal center), PCy<sub>3</sub> (15 mol %), and 2-pyridinemethanol **3** (20 mol %) in DMPU (0.5 mL) were heated at 190 °C for 20 h under N<sub>2</sub> flow and water flowing through the reflux condenser. Catalyst % is calculated per metal center (i.e. 15% Ru content = 5 mol % Ru<sub>3</sub>(CO)<sub>12</sub>). <sup>b</sup>Conversion of methyl ester was determined by <sup>1</sup>H NMR spectroscopy. <sup>c</sup>Three molecular sieves were added to the reaction vessel (4Å). <sup>d</sup>Reactions with drying agents were often inconsistent, and therefore the average conversion (range of conversions) is reported. <sup>e</sup>Reactions were at 4x the standard scale (1.24 mmol of **2**).

**Table S18.** Dual-catalytic decarbonylation of methyl palmitate **2** with various alcohols and Lewis acids.<sup>a</sup>

| entry          | Lewis Acid                         | alcohol  | conv. to olefin <sup>b</sup> (%) | conv. to donor ester <sup>b</sup> (%) |
|----------------|------------------------------------|----------|----------------------------------|---------------------------------------|
| 1              | InCl <sub>3</sub>                  | <b>3</b> | 4                                | 9                                     |
| 2              | LiCl                               | <b>3</b> | 15                               | <1                                    |
| 3              | KI                                 | <b>3</b> | 4                                | <1                                    |
| 4              | NaOAc                              | <b>3</b> | 24                               | 13                                    |
| 5 <sup>c</sup> | Al(O <sup>i</sup> Pr) <sub>3</sub> | <b>3</b> | 3                                | <1                                    |
| 6              | ZnO                                | <b>5</b> | <1                               | <1                                    |
| 7              | LaCl <sub>3</sub>                  | <b>6</b> | 3                                | 15                                    |
| 8              | ZnO                                | <b>6</b> | <1                               | 13                                    |
| 9              | InCl <sub>3</sub>                  | <b>6</b> | <1                               | <1                                    |

<sup>a</sup>Conditions: methyl palmitate **2** (0.31 mmol, 1 equiv), Lewis acid (25 mol %), Ru<sub>3</sub>(CO)<sub>12</sub> (15 mol % per metal center), PCy<sub>3</sub> (15 mol %), and alcohol (20 mol %) in DMPU (0.5 mL) were heated at 190 °C. Catalyst % is calculated per metal center (i.e. 15% Ru content = 5 mol % Ru<sub>3</sub>(CO)<sub>12</sub>).

<sup>b</sup>Conversion of methyl ester was determined by <sup>1</sup>H NMR spectroscopy.

**Table S19.** Dual-catalytic decarbonylation reactions with palmitic acid.<sup>a</sup>

| entry          | Lewis Acid (mol %)       | conv. to olefin <sup>b</sup> (%) | conv. to <b>1</b> <sup>b</sup> (%) |
|----------------|--------------------------|----------------------------------|------------------------------------|
| 1              | ZnCl <sub>2</sub> (25 %) | 4                                | 9                                  |
| 2              | none                     | 15                               | <1                                 |
| 3 <sup>c</sup> | ZnCl <sub>2</sub> (25 %) | <1                               | <1                                 |

<sup>a</sup>Conditions: palmitic acid (0.31 mmol, 1 equiv), ZnCl<sub>2</sub> (25 mol %), Ru<sub>3</sub>(CO)<sub>12</sub> (15 mol % per metal center), PCy<sub>3</sub> (15 mol %), and 2-pyridinemethanol **3** (20 mol %) in DMPU (0.5 mL) were heated at 190 °C. Catalyst % is calculated per metal center (i.e. 15% Ru content = 5 mol % Ru<sub>3</sub>(CO)<sub>12</sub>).

<sup>b</sup>Conversion of carboxylic acid was determined by <sup>1</sup>H NMR spectroscopy. <sup>c</sup>Three molecular sieves were added to the reaction vessel (4Å).

**Table S20.** Studying the effect of adding catalytic reagents after 14 h in a 35 mL pressure vessel.<sup>a</sup>

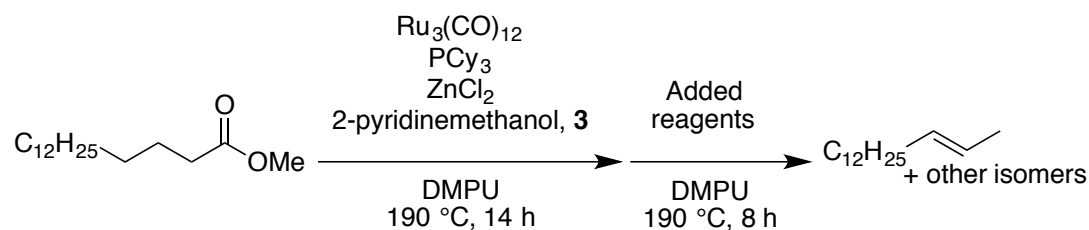

| entry          | added reagents                                                                  | conv. to olefin <sup>b</sup> (%) | conv. to <b>1</b> <sup>b</sup> (%) |
|----------------|---------------------------------------------------------------------------------|----------------------------------|------------------------------------|
| 1 <sup>c</sup> | none                                                                            | 58                               | <1                                 |
| 2              | $\text{Ru}_3(\text{CO})_{12}$ and $\text{PCy}_3$                                | 62                               | <1                                 |
| 3              | $\text{Ru}_3(\text{CO})_{12}$ , $\text{PCy}_3$ , and $\text{ZnCl}_2$            | 62                               | <1                                 |
| 4              | $\text{Ru}_3(\text{CO})_{12}$ , $\text{PCy}_3$ , $\text{ZnCl}_2$ , and <b>3</b> | 74                               | <1                                 |

<sup>a</sup>Conditions: methyl palmitate **2** (0.31 mmol, 1 equiv),  $\text{ZnCl}_2$  (25 mol %),  $\text{Ru}_3(\text{CO})_{12}$  (15 mol % per metal center),  $\text{PCy}_3$  (15 mol %), and 2-pyridinemethanol **3** (20 mol %) in DMPU (0.5 mL) were heated at 190 °C for 14 h. The pressure vessel was brought back into the glovebox where reagents were added to the vessel ( $\text{ZnCl}_2$  (25 mol %),  $\text{Ru}_3(\text{CO})_{12}$  (15 mol % per metal center),  $\text{PCy}_3$  (15 mol %), and 2-pyridinemethanol **3** (20 mol %)). The reaction was heated for an additional 8 h.

<sup>c</sup>Reaction was heated only for 14 h total.

## 7. References

- (1) T. A. Manuel, *Inorg. Chem.*, 1963, **2**, 854.
- (2) S. D. Ittel, H. Berke, H. Dietrich, J. Lambrecht, P. Harter and J. Opitz, Springer, W. *Inorganic Syntheses*; Springer, 1990; Vol. 28, pp 98–104.
- (3) Y. D. Y. L. Getzler, J. A. R. Schmidt and G. W. Coates, *J. Chem. Educ.*, 2005, **82**, 621.
- (4) P. Kumar, V. S. Kashid, Y. Reddi, J. T. Mague, R. B. Sunoj and M. S. Balakrishna, *Dalton Trans.*, 2015, **44**, 4167.
